# Supplementary material for: Clinical Practice Guidelines for the Antibiotic Treatment of Community-Acquired Urinary Tract Infections
Source: PubMed Central journal article supplement — Infect Chemother. 2018 Mar 21;50(1):67–100. doi: 10.3947/ic.2018.50.1.67 (PMC5895837; doi:10.3947/ic.2018.50.1.67), 2018-03-21
Supplement: ic-50-67-s001.pdf [file ic-50-67-s001.pdf]

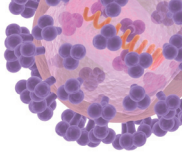

## 요로감염 항생제 사용지침

강철인<sup>1\*</sup>, 김지은<sup>2\*</sup>, 박대원<sup>3\*</sup>, 김백남<sup>4\*</sup>, 하유신<sup>5\*</sup>, 이승주<sup>6</sup>, 여정균<sup>7</sup>, 민승기<sup>8</sup>, 이희영<sup>9</sup>, 위성헌<sup>10</sup>

<sup>1</sup>성균관대학교 삼성서울병원 감염내과; <sup>2</sup>한양대학교 구리병원 감염내과; <sup>3</sup>고려대학교 안산병원 감염내과; <sup>4</sup>인제대학교 상계백병원 감염내과; <sup>5</sup>가톨릭대학교 서울성모병원 비뇨의학과; <sup>6</sup>가톨릭대학교 성빈센트병원 비뇨의학과; <sup>7</sup>인제대학교 서울백병원 비뇨의학과; <sup>8</sup>국립경찰병원 비뇨의학과; <sup>9</sup>분당서울대병원 임상예방의학센터; <sup>10</sup>가톨릭대학교 성빈센트병원 감염내과

Urinary tract infections (UTIs) are infectious diseases that commonly occur in communities. Although several international guidelines for the management of UTIs have been available, clinical characteristics, etiology and antimicrobial susceptibility patterns may differ from country to country. This work represents an update of the 2011 Korean guideline for UTIs. The current guideline was developed by the update and adaptation method. This clinical practice guideline provides recommendations for the diagnosis and management of UTIs, including asymptomatic bacteriuria, acute uncomplicated cystitis, acute uncomplicated pyelonephritis, complicated pyelonephritis related to urinary tract obstruction, and acute bacterial prostatitis. This guideline targets community-acquired UTIs occurring among adult patients. Healthcare-associated UTIs, catheter-associated UTIs, and infections in immunocompromised patients were not included in this guideline.

**Key Words:** Urinary tract infection; Guideline; Cystitis; Pyelonephritis; Prostatitis

### 머리말

#### 1. 지침 작성의 배경

요로감염은 지역사회에서 흔하게 발생하는 감염질환으로 감염부위에 따라 상부요로감염(신우신염)과 하부요로감염(방광염, 전립선염)으로 나누어지며, 기저질환의 유무나 요로의 해부학적 또는 기능적 이상에 따라 단순 및 복잡성 요로감염으로 구분할 수 있다. 요로감염의 임상 양상은 무증상 세균뇨에서 패혈성 쇼크까지 다양하여 이에 대해 충분히 이해하고 적절하게 항생제를 사용하는 것이 중증 합병증의 예방, 항생제 오남용의 방지 및 내성 세균 발현의 차단을 위해 매우 중요하다.

항생제 내성에 대한 2014년도 세계보건기구의 전 세계적인 감시 보고서에서 요로감염의 주요 원인균에서 세팔로스포린계와 플루오로퀴놀론계 항생제에 대한 내성 증가가 세계 보건에 심각한 문제점

으로 제기되었고 우리나라도 이에 대한 대책이 필요한 실정이다. 이러한 문제점들을 국가적으로 홍보하고 해결하려는 노력이 필요하다. 궁극적으로 최신 자료를 바탕으로 항생제 선택의 표준 지침을 제정하고 보급하여 요로감염을 적절하게 치료하고 항생제 내성균의 출현을 차단하는 정책들이 요구되고 있다.

미국과 유럽에서 요로감염에 1차 항생제로 권고되는 trimethoprim-sulfamethoxazole 항생제에 대한 국내 요로감염 원인균의 내성률이 미국이나 유럽에 비해 높아 국내에서 1차 약제로 플루오로퀴놀론계 항생제가 주로 권고되고 있지만 국내 요로감염 원인균의 플루오로퀴놀론계 항생제에 대한 내성률도 미국이나 유럽에 비해 높기 때문에 플루오로퀴놀론계 사용 시에 치료 실패의 가능성이 높다. 플루오로퀴놀론계 항생제의 대체 항생제로 니트로푸란토인, 포스포마이신 등이 외국에서 권장되고 있지만 하부 요로감염에만 사용될 수 있다는 단점이 있고 국내에서는 홍보 부족과 약제 도입의 제한 등으로 인해 널리 사용되고 있지 않다. 또한 발열을 동반한 상부 요로감염

**Received:** February 5, 2018 **Published online:** March 21, 2018

교신저자: 위성헌

16247 경기도 수원시 팔달구 중부대로 93, 가톨릭대학교 성빈센트병원 감염내과

Tel: +82-31-249-8169, Fax: +82-31-253-8898

E-mail: wiesh@chol.com

\*공동 제1 저자

에는 정주용 세팔로스포린 항생제가 흔하게 투여되는 데 광범위 베타락탐분해효소를 생산하는 내성균이 증가하면서 치료 실패의 가능성이 높아지고 있다.

요로감염을 치료하는 임상 의사에게 과학적 근거를 제시하는 여러 진료지침들이 이미 외국에서 개발되어 있고 2011년 대한감염학회, 대한화학요법학회, 대한요로생식기감염학회, 대한임상미생물학회가, 2016년 대한요로생식기감염학회가 국내 지침을 개발하여 발표하였다. 최근 원인균의 항생제 내성 변화와 최신 논문들의 발표 등으로 국내 지침의 갱신이 요구되고 있었으며 관련 학회의 정책과 질병관리본부의 지원에 의해 본 지침을 개발하게 되었다.

## 2. 지침 적용이 가능한 대상

이번 지침은 18세 이상 환자에서 발생한 지역사회 획득 요로 감염의 항생제 사용에 관한 지침이며 무증상 세균뇨, 단순 방광염, 단순 신우신염, 요로 폐쇄 관련 복잡성 신우신염, 급성 세균성 전립선염을 대상 질환으로 하였다. 입원 후 48시간 경과 후에 발생한 병원 획득 감염이나 도관 관련 요로감염은 제외하였고 당뇨병 환자, 면역저하자, 기타 만성 기저질환 환자 등 요로 폐쇄 이외의 복잡성 요인이 있는 요로감염환자도 지침 적용 대상에서 제외하였다.

## 3. 지침 활용을 권장하는 대상

본 지침은 다양한 규모의 병원이나 의원에서 요로감염 환자를 진료하는 다양한 과의 전문의, 전공의, 일반의 모두가 쉽게 참고할 수 있도록 개발하였다.

## 4. 지침 갱신의 원칙과 방법

개발을 진행하고 있는 시점에서 참고할 수 있는 국내외의 임상 진료지침과 최신 문헌들을 기초로 하여 개발되었다. 요로감염에 대한 항생제 치료 방법이 새로이 개발되거나 원인균의 항생제 내성이 중대하게 변화하는 경우에는 지침의 개정을 고려할 수 있다.

## 진료지침 작성 과정

### 1. 진료지침 위원회 구성

개발위원회는 대한화학요법학회 및 대한감염학회에서 추천 받은 위원장 1인(가톨릭의대 위성헌)과 위원 5인(인제의대 김백남, 한양대의대 김지은, 고려의대 박대원, 성균관의대 강철인, 분당서울대병원 이희영), 대한요로생식기감염학회에서 추천 받은 위원 1인(가톨릭의대 이승주), 대한비뇨기과학회에서 추천 받은 2인(인제의대 여정균, 경찰병원 민승기), 대한신장학회에서 추천받은 2인(원광의대 이지은, 충남의대 함영록)으로 구성하였다.

### 2. 진료지침 개발 과정

진료지침 개발방법은 진료지침 위원회에서 결정하였다. 2011년 개발된 진료지침의 개정(update)을 기본으로 하고, 기존 핵심질문은 2011년 지침 이후의 근거를 검색하여 근거를 추가한 이후 근거 및 권고 수준을 결정하는 것으로 하였다. 또한 추가가 필요한 핵심질문은 수용개작(adaptation)의 방법으로 진행하기로 하였다. 이에 따라 단순 방광염에 대해서는 수용개작으로 진행하기로 하고, 나머지 네 가지 질환에 대해서는 핵심질문 내용을 정리하여 일부 수정한 후 개정하였다.

#### 1) 진료지침의 검색

National Guideline Clearinghouse(NGC)와 OVID MEDLINE에서 5개 질환에 대한 2011년 이후 진료지침을 검색하였다. NGC에서는 질환명으로 검색하였고, Medline에서는 질환에 대한 Mesh term과 진료지침 검색 필터를 이용하여 검색하였다[1]. 검색 결과는 표 1과 같으며, 검색된 결과를 위원 2인이 선택하여 5개 질환에 대해 총 7개 지침이 포함되었다.

#### 2) 핵심 임상 질문의 도출

선택된 7개 진료지침을 참고하여 2011년 진료지침의 핵심질문을

## 권고 요약

|                                                                                              | 권고수준 | 근거수준 |
|----------------------------------------------------------------------------------------------|------|------|
| <b>KQ 1.</b> 임신부에서 무증상 세균뇨를 치료하면 증상성 요로감염이나 출산 전후 합병증(perinatal complication) 발생을 예방할 수 있는가? |      |      |
| 1-1. 임신 초기 여성에서 세균뇨를 선별하여 치료해야 한다                                                            | 강함   | 낮음   |
| <b>KQ 2.</b> 비임신 여성에서 무증상 세균뇨를 치료하면 증상성 요로감염 발생을 예방할 수 있는가?                                  |      |      |
| 2-1. 비임신 여성에서 무증상 세균뇨의 선별과 치료를 권하지 않는다                                                       | 강함   | 높음   |
| <b>KQ 3.</b> 양로원에 거주하는 여성에서 무증상 세균뇨를 치료하면 증상성 요로감염 발생을 예방할 수 있는가?                            |      |      |
| 3-1. 양로원 거주 여성에서 무증상 세균뇨의 선별과 치료를 권하지 않는다                                                    | 강함   | 높음   |

|                                                                                                                                  | 권고수준 | 근거수준  |
|----------------------------------------------------------------------------------------------------------------------------------|------|-------|
| <b>KQ 1.</b> 임신부에서 무증상 세균뇨를 치료하면 증상성 요로감염이나 출산 전후 합병증(perinatal complication) 발생을 예방할 수 있는가?                                     |      |       |
| 1-1. 임신 초기 여성에서 세균뇨를 선별하여 치료해야 한다                                                                                                | 강함   | 낮음    |
| <b>KQ 2.</b> 비임신 여성에서 무증상 세균뇨를 치료하면 증상성 요로감염 발생을 예방할 수 있는가?                                                                      |      |       |
| 2-1. 비임신 여성에서 무증상 세균뇨의 선별과 치료를 권하지 않는다                                                                                           | 강함   | 높음    |
| <b>KQ 3.</b> 양로원에 거주하는 여성에서 무증상 세균뇨를 치료하면 증상성 요로감염 발생을 예방할 수 있는가?                                                                |      |       |
| 3-1. 양로원 거주 여성에서 무증상 세균뇨의 선별과 치료를 권하지 않는다                                                                                        | 강함   | 높음    |
| <b>KQ 4.</b> 당뇨병이 있는 여성에서 무증상 세균뇨를 치료하면 증상성 요로감염 발생을 예방할 수 있는가?                                                                  |      |       |
| 4-1. 당뇨병 여성에서 무증상 세균뇨의 선별과 치료를 권하지 않는다                                                                                           | 강함   | 높음    |
| <b>KQ 5.</b> 척수손상 환자에서 무증상 세균뇨를 치료하면 증상성 요로감염의 발생을 예방할 수 있는가?                                                                    |      |       |
| 5-1. 척수손상 환자에서 무증상 세균뇨의 선별과 치료를 권하지 않는다                                                                                          | 강함   | 낮음    |
| <b>KQ 6.</b> 유치 도뇨관이 있는 환자에서 무증상 세균뇨를 치료하면 증상성 요로감염 발생을 예방할 수 있는가?                                                               |      |       |
| 6-1. 유치 도뇨관이 있는 환자에서 무증상 세균뇨의 선별과 치료를 권하지 않는다                                                                                    | 강함   | 낮음    |
| <b>KQ 7.</b> 요도경유 전립선절제술(TUR-P) 등과 같은 점막출혈이 예상되는 비뇨기와 시술을 받을 환자에서 무증상 세균뇨를 치료하면 감염성 합병증을 예방할 수 있는가?                              |      |       |
| 7-1. 점막출혈이 예상되는 비뇨기와 시술을 받을 경우 시술 전에 무증상 세균뇨를 선별하여 치료하기를 권한다                                                                     | 강함   | 높음    |
| <b>KQ 8.</b> 단순 방광염 환자의 경험적 치료시 항생제 종류와 사용기간에 따라 경과에 차이가 있는가?<br>- 외래에서 단순 방광염 환자를 치료할 때 다음의 항생제를 사용하는 것이 좋은 치료 성과와 예후를 위해 적절하다. |      |       |
| 8-1. Nitrofurantoin monohydrate/macrocrystals 100mg 하루 2회씩 5일 이상 투여할 것을 권고한다.                                                    | 강함   | 높음    |
| 8-2. Fosfomycin trometamol 3 g 단회 사용을 권고한다                                                                                       | 강함   | 높음    |
| 8-3. Pivmecillinam 400 mg을 하루 3회씩, 3일 이상 투여할 것을 권고한다                                                                             | 강함   | 높음    |
| 8-4. 경구용 fluoroquinolone 계열 항생제를 3일 이상 투여할 것을 권고한다                                                                               | 강함   | 낮음    |
| 8-5. Beta-lactam 계열로는 경구 세팔로스포린을 사용할 수 있으며, cefpodoxime, cefdinir, cefcapene, cefditoren, cefixime 등을 5일 이상 투여하도록 권고한다.          | 강함   | 낮음    |
| <b>KQ 9.</b> 단순 방광염 환자에서 소변배양 검사는 필요한가?                                                                                          |      |       |
| 9-1. 신우신염이 의심되는 경우, 비전형적인 증상이 있는 경우, 임신부인 경우, 남성의 요로감염이 의심되는 경우, 치료 종료 후 2-4주 이내에 증상이 호전되지 않거나 재발한 경우에는 소변배양 검사가 필요하다.           | 강함   | 낮음    |
| 9-2. 국내의 경우, 요로감염 원인균의 항생제 내성을 증가로 인해 소변배양 검사를 시행하는 것이 적절하다 (근거수준: 매우 낮음, 권고수준: 강함).                                             | 강함   | 매우 낮음 |
| <b>KQ 10.</b> 성인의 단순 급성신우신염에 대한 효과적인 항생제 치료 요법은?                                                                                 |      |       |
| 10-1. 모든 급성 신우신염 환자는 경험적으로 항생제를 투여하기 전에 소변배양 검사를 실시한다                                                                            | 강함   | 매우 낮음 |
| 10-2. 초기에 투여된 경험적 항생제는 원인 미생물의 항생제 감수성 결과에 따라 조절이 필요하다.                                                                          | 강함   | 매우 낮음 |
| 10-3. 입원이 필요하지 않은 단순 신우신염의 초기 경험적 항생제는 정주용 ceftriaxone 1-2 g 또는 amikacin 1일 용량을 투여한 후, 배양 결과가 확인될 때까지 경구용 fluoroquinolone을 투여한다. | 강함   | 매우 낮음 |
| 10-4. 입원이 필요하지 않은 단순 신우신염의 초기 경험적 항생제는 정주용 ciprofloxacin 400mg을 투여한 후, 배양 결과가 확인될 때까지 경구용 ciprofloxacin (500mg 하루 2회)을 투여할 수 있다. | 약함   | 낮음    |
| 10-5. 배양검사 결과에서 감수성을 보이는 경우, 경구용 항균제로 fluoroquinolone, TMP/SMX, beta-lactam 항생제를 사용할 수 있다.                                       | 강함   | 높음    |
| 10-6. 단순 급성신우신염에서 감수성을 보이는 경구용 항생제를 7-14일 투여하는데,<br>- ciprofloxacin (500 mg 하루 2회 7일간 또는 서방형 ciprofloxacin 1000 mg 하루 1회 7-14일간) | 강함   | 높음    |

|                                                                                                                                                                                                        | 권고수준 | 근거수준  |
|--------------------------------------------------------------------------------------------------------------------------------------------------------------------------------------------------------|------|-------|
| - levofloxacin (500 mg 하루 1회 7일간 또는 750 mg 하루 1회 5일간)                                                                                                                                                  | 강함   | 높음    |
| - TMP/SMX (160/800 mg 하루 2회 14일간)                                                                                                                                                                      | 강함   | 높음    |
| - 경구용 beta-lactam 항생제 (10-14일간)                                                                                                                                                                        | 강함   | 매우 낮음 |
| 10-7. 입원이 필요한 신우신염의 경우 초기 정주용 항생제로,                                                                                                                                                                    |      |       |
| - fluoroquinolone                                                                                                                                                                                      | 약함   | 낮음    |
| - aminoglycoside +/- ampicillin                                                                                                                                                                        | 약함   | 낮음    |
| - 2세대 cephalosporin                                                                                                                                                                                    | 약함   | 낮음    |
| - 광범위 cephalosporin                                                                                                                                                                                    | 강함   | 높음    |
| - beta-lactam/beta-lactamase inhibitor +/- aminoglycoside                                                                                                                                              | 약함   | 낮음    |
| - aminoglycoside +/- beta-lactam                                                                                                                                                                       | 약함   | 낮음    |
| - carbapenem                                                                                                                                                                                           | 약함   | 낮음    |
| - 해열이 된 후에는 분리된 원인균에 감수성이 있는 경구용 항생제 또는 내성률이 토대로 결정된 경구용 항생제로 변경하여 투여한다.                                                                                                                               | 강함   | 낮음    |
| 10-8. 중증 패혈증이나 패혈 쇼크 등으로 중환자실 입원이 필요한 급성 신우신염 환자에서는 국내 내성률 등을 고려하여 piperacillin/tazobactam 또는 carbapenem을 투여한다                                                                                         | 강함   | 낮음    |
| <b>KQ 11. ESBL 생성 균주에 의한 단순 급성신우신염의 non-carbapenem계 항균제 치료 요법은?</b>                                                                                                                                    |      |       |
| 11-1. 감수성을 보이는 ESBL 생성 균주에 대해 fosfomycin, TMP-SMX, cefepime, ceftazidime-avibactam, ceftolozane-tazobactam, amoxicillin-clavulanate, piperacillin-tazobactam, amikacin을 carbapenem 대체로 사용해 볼 수 있다.     | 약함   | 낮음    |
| <b>KQ 12. 요로 폐쇄 관련 신우신염이 발생한 성인 환자에서 초기에 투여할 적절한 경험적 항균제는 무엇인가?</b>                                                                                                                                    |      |       |
| 12-1. 요로 폐쇄 관련 신우신염 환자에서의 경험적 항생제 선택은 단순 신우신염 치료에 준해서 시행하면 되나, 임상 증상이 심한 경우에는 패혈증을 동반한 중증 요로감염의 경우에 준해서 시행한다.                                                                                          | 강함   | 낮음    |
| 12-2. 초기 경험적 항생제로는 fluoroquinolone, beta-lactam/beta-lactamase inhibitor, 광범위 cephalosporin, aminoglycoside, carbapenem 등을 사용한다.                                                                       | 강함   | 낮음    |
| 12-3. 패혈증을 동반한 경우와 잦은 재발성 감염인 경우에는 piperacillin/tazobactam, 광범위3세대 cephalosporin 또는 4세대 cephalosporin, carbapenem 등을 사용할 수 있다. 항생제 내성균 감염의 위험성이 높은 경우에는 광범위 beta-lactam 계열 항생제와 amikacin 병합을 고려할 수 있다. | 약함   | 낮음    |
| <b>KQ 13. 요로 폐쇄 관련 신우신염이 발생한 성인 환자에서 항생제 병합 요법은 단독 요법에 비해 우월한가?</b>                                                                                                                                    |      |       |
| 13-1. 요로 폐쇄 관련 신우신염 환자에서의 원인균과 항생제 감수성 결과를 아는 경우 신우신염의 치료 항생제로서 일반적으로 추천되는 감수성 있는 항생제를 단독 요법으로 사용한다.                                                                                                   | 강함   | 낮음    |
| 13-2. 패혈증이 의심되는 중증 감염, 재발이 많았던 경우나 의료관련 감염인 경우는 초기 경험적 치료를 강화하여 병합 요법을 고려할 수 있다.                                                                                                                       | 약함   | 낮음    |
| 13-3. 병합 요법을 고려하는 경우 광범위 beta-lactam 계 항생제와 aminoglycoside 또는 fluoroquinolone을 병합할 수 있다.                                                                                                               | 약함   | 낮음    |
| <b>KQ 14. 요로 폐쇄 관련 신우신염이 발생한 성인 환자에서 요로 폐쇄를 해소시켜야 하는가? 그렇다면 적정 시기는 언제인가?</b>                                                                                                                           |      |       |
| 14-1. 요로 폐쇄 관련 신우신염은 항생제 치료와 함께 감압을 위한 시술이 필요하다.                                                                                                                                                       | 강함   | 높음    |
| 14-2. 요로 폐쇄 관련 신우신염으로 진단되고 배액 또는 감압이 필요한 경우에는 가능한 빨리 시술을 시행해야 한다.                                                                                                                                      | 강함   | 낮음    |
| 14-3. 요관 결석에 수반된 수신증과 요로감염이 있는 경우 경피적 신루 설치술 또는 요관 스텐트 삽입술을 가능한 빨리 시행한다.                                                                                                                               | 강함   | 낮음    |
| 14-4. 전립선 비대에 의한 급성 요로 폐쇄에 동반한 요로감염이 있는 경우 가능한 빨리 도뇨관을 삽입한다.                                                                                                                                           | 강함   | 낮음    |
| <b>KQ 15. 요로 폐쇄 관련 신우신염이 발생한 성인 환자에서 적절하게 요로 폐쇄를 해소시킨 이후 얼마나 항균제 치료를 시행해야 하는가?</b>                                                                                                                     |      |       |
| 15-1. 요로 폐쇄 관련 신우신염 환자에서 요로 폐쇄 유발 요인이 교정되고 추가적 감염의 요소가 없다면 일반적으로 7일에서 14일간 항생제를 사용할 수 있다.                                                                                                              | 약함   | 낮음    |

|                                                                                                                             | 권고수준 | 근거수준 |
|-----------------------------------------------------------------------------------------------------------------------------|------|------|
| 15-2. 원인 질환의 치료나 증상의 호전 및 요로 폐쇄의 교정이 불충분하면 신장 농양에 준해서 21일 이상 치료를 연장할 수 있다.                                                  | 약함   | 낮음   |
| <b>KQ 16.</b> 기종성 신우신염(emphysematous pyelonephritis) 발생이 의심되는 성인 환자에서 어떤 경험적 항균제를 사용해야 하는가?                                 |      |      |
| 16-1. 기종성 신우신염 발생이 의심되는 환자에서 경험적 항생제 선택은 단순 신우신염 치료에 준해서 시행하면 되나, 임상 증상이 심한 경우는 패혈증을 동반한 중증 요로감염의 경우에 준해서 시행한다.             | 강함   | 낮음   |
| <b>KQ 17.</b> 기종성 신우신염(emphysematous pyelonephritis) 발생이 의심되는 성인 환자에서 경피적 배농술을 시행해야 하는가? 신장 절제술을 고려해야 하는 경우는 언제인가?          |      |      |
| 17-1. 기종성 신우신염 발생이 의심되는 환자에서 가스 형성이 신우에 국한되고 신장 실질의 침범이 없는 경우는 항생제만 투여하며 신장 실질을 침범하는 경우는 항생제 투여와 함께 경피적 배농술이나 수술을 시행한다.     | 강함   | 낮음   |
| 17-2. 가스형성이 신장 주변부까지 광범위하게 침범한 경우와 경피적 배농술에도 호전이 없는 경우는 신장 절제술을 고려한다.                                                       | 강함   | 낮음   |
| <b>KQ 18.</b> 급성 세균성 전립선염 환자의 경우 입원 및 정주용 항생제 치료가 경구 항균제 치료에 비해 효과적인가?                                                      |      |      |
| 18-1. 급성 세균성 전립선염은 급성 중증질환이므로 입원치료와 즉각적인 경험적 항생제 투여가 필요하다.                                                                  | 강함   | 낮음   |
| 18-2. 소변 및 혈액배양 검사를 위한 검체를 수집한 후 즉시 비경구적 항생제를 투여한다. 적절한 수분 공급 및 안정을 취하고 필요시에는 비스테로이드성 항염제와 같은 진통제를 투여한다.                    | 강함   | 낮음   |
| <b>KQ 19.</b> 급성 세균성 전립선염의 치료를 위한 경험적 항생제 선택은 3세대 cephalosporin을 fluoroquinolone제제보다 우선적으로 고려할 수 있는가?                       |      |      |
| 19-1. 입원이 필요한 급성 세균성 전립선염 환자에 대한 항생제는 3세대 cephalosporin 제제, 광범위 beta-lactam/beta-lactamase inhibitor 또는 carbapenem 등을 권장한다. | 강함   | 낮음   |
| 19-2. 항생제 감수성 결과가 나올 때까지 경험적 항생제 투여를 지속하며, 결과에 따라 항생제를 변경한다                                                                 | 강함   | 낮음   |
| <b>KQ 20.</b> 급성 세균성 전립선염 환자에서 cephalosporin과 aminoglycoside 의 병합 요법은 단독요법에 비해 치료 효과가 높은가?                                  |      |      |
| 20-1. 패혈증이 의심되는 중증 감염, 재발이 많았던 경우는 초기 경험적 항생제 치료를 강화하여 항생제 병합 요법을 고려할 수 있다.                                                 | 약함   | 낮음   |
| 20-2. 항생제 병합 요법으로는 beta-lactam 계 항생제와 aminoglycoside 계 항생제의 병합 투여를 고려할 수 있다.                                                | 약함   | 낮음   |
| <b>KQ 21.</b> 급성 세균성 전립선염 환자에게 효율적 치료를 위하여 알파차단제와 같은 약물의 투여로 치료 효과를 높일 수 있는가?                                               |      |      |
| 21-1. 배뇨 후 잔뇨가 확인되거나 배뇨 증상을 호소하는 경우 알파차단제 사용을 권장한다                                                                          | 강함   | 낮음   |
| <b>KQ 22.</b> 급성 세균성 전립선염 환자에서 요폐색 이나 잔뇨가 증가할 경우 치골상부도뇨관 유지가 필요한가?                                                          |      |      |
| 22-1. 급성 요폐가 있을 때에는 치골상부 도뇨관을 유지해야 한다                                                                                       | 강함   | 낮음   |
| 22-2. 요폐색의 증거가 없는 환자에서의 요도 도뇨관 유지는 만성 전립선염으로의 진행 가능성을 높일 수 있다.                                                              | 약함   | 낮음   |
| <b>KQ 23.</b> 급성 세균성 전립선염 환자에서 전립선 농양이 발생할 경우 천자 및 배농이 치료 성적을 향상시킬 수 있는가?                                                   |      |      |
| 23-1. 항생제 치료에 반응하지 않는 전립선 농양에 대해서는 경직장 초음파유도 바늘 흡인, 경직장 초음파유도 카테터배농, 경회음부 초음파유도 배농 또는 경요도 전립선 농양 절제술 등을 시행한다.               | 강함   | 낮음   |

PICO 형식으로 재정리하고, 단순방광염의 임상질문을 새롭게 작성하여 총 23개의 핵심질문을 도출하였다.

3) 진료지침의 평가 및 선정

7개 진료지침에 대해 지침당 3인이 AGREE II 도구를 이용하여 질

평가를 시행하였다. 질평가 결과는 표 2에 제시하였으며, 질평가 결과에 대해 진료지침 위원회 논의를 거쳐 단순방광염 지침의 수용개작에 포함할 진료지침 최종 5개를 선택하였다. 선택된 지침은 표와 같다. 2016년 요로생식감염학회 지침과 2011년 대한감염학회 지침은 AGREE 평가 점수가 높지 않았으나 국내에서 개발된 지침이라는



표 1. 질환별 진료지침 검색 결과

| 질환                    | NGC                                              | OID MEDLINE<br>(검색식+ 진료지침 검색필터)                                                                                | 중복제거 이후 숫자 |
|-----------------------|--------------------------------------------------|----------------------------------------------------------------------------------------------------------------|------------|
| Bacterial prostatitis | 검색어: Prostatitis<br>결과: 86<br>선택: 1              | 검색식: Prostatitis.mp. or exp Prostatitis/<br>결과: 17<br>선택: 2                                                    | 3          |
| Cystitis              | 검색어: Cystitis<br>결과: 19<br>선택: 1                 | 검색식: exp Cystitis, Interstitial/ or exp Cystitis/ or<br>cystitis.mp.<br>결과: 89<br>선택: 5                        | 6          |
| Bacteriuria           | 검색어: Bacteriuria<br>결과: 14<br>선택: 2              | 검색식: Bacteriuria.mp. or exp Bacteriuria/<br>결과: 44<br>선택: 3                                                    | 3          |
| Complicated UTI       | 검색어: Urinary tract infection<br>결과: 113<br>선택: 2 | 검색식: Urinary tract infections.mp. or exp Urinary<br>tract infections/<br>결과: 333<br>선택: 1                      | 2          |
| Acute pyelonephritis  | 검색어: Pyelonephritis<br>결과: 12<br>선택: 2           | 검색식: exp Pyelonephritis, Xanthogranulomatous/or<br>exp Pyelonephritis/or pyelonephritis.mp.<br>결과: 36<br>선택: 6 | 6          |

표 2. 선택된 진료 지침의 특성

| AGREE 평가영역 | IDSA,<br>2010 | DGU,<br>2011 | SIGN,<br>2012 | EAU,<br>2015 | ACOG,<br>2016 | 요로생식감염학회,<br>2016    | 감염학회,<br>2011        |
|------------|---------------|--------------|---------------|--------------|---------------|----------------------|----------------------|
| 범위와 목적     | 81.5%         | 66.7%        | 92.6%         | 59.3%        | 77.8%         | 33.3%                | 31.5%                |
| 이해당사자의 참여  | 42.6%         | 57.4%        | 81.5%         | 42.6%        | 18.5%         | 18.5%                | 25.9%                |
| 개발의 엄격성    | 77.8%         | 47.2%        | 69.4%         | 37.5%        | 29.2%         | 31.9%                | 18.1%                |
| 표현의 명확성    | 88.9%         | 66.7%        | 88.9%         | 74.1%        | 70.4%         | 64.8%                | 44.4%                |
| 적용성        | 36.1%         | 29.2%        | 62.5%         | 22.2%        | 19.4%         | 13.9%                | 16.7%                |
| 편집의 독립성    | 72.2%         | 22.2%        | 50.0%         | 83.3%        | 5.6%          | 5.6%                 | 27.8%                |
| 종합평가       | 사용을<br>추천함    | 사용을<br>추천 안함 | 사용을<br>추천함    | 사용을<br>추천함   | 사용을<br>추천 안함  | 사용을<br>추천함<br>(수정필요) | 사용을<br>추천함<br>(수정필요) |
| 선택 여부      | 선택            | 배제           | 선택            | 선택           | 배제            | 선택                   | 선택                   |

IDSA, Infectious Diseases Society of America; DGU, German Society of Urology; SIGN, Scottish Intercollegiate Guidelines Network; EAU, European Association of Urology; ACOG, American Congress of Obstetricians and Gynecologists

점을 감안하여 적용 가능성이 높아 선택하였다.

4) 수용개작

단순방광염의 경우 5개 지침에서 핵심질문에 대한 권고안과 등급을 추출하고, 이에 대한 수용가능성과 적용성을 평가하여 지침위원회에서 논의하였다.

5) 추가 근거 검색

개정 및 수용개작에 포함된 지침의 최신성을 검토한 후 필요한 기

간에 대해 추가 근거를 검색하였다. 검색결과를 위원회 2인이 선택하여 개정내용에 포함하였다.

6) 권고안 작성 및 권고등급 결정

개정된 경우 수정된 핵심질문에 맞게 권고안을 재작성하였고, 수용개작의 경우 선택된 5개 지침의 권고안을 이용하여 새로운 권고안을 작성하였다.

개정을 하는 무증상 세균뇨, 단순 신우신염, 요로 폐쇄 관련 복잡성 신우신염, 급성 세균성 전립선염에서는 2011년 지침의 권고등급은 아

래와 같은 기준으로 변환하였다. 수용개작의 경우 GRADE로 변환하는 것을 원칙으로 하여, 정리내용에 따라 변환 기준을 결정하였다(표 3).

7) 권고안 채택을 위한 합의방법론

권고안 내용과 권고등급에 대해 진료위원회에서 합의 회의를 진행하여 결정하였다.

8) 외부 전문가 평가 및 검토

지침 개발위원회 회의를 통해 마련된 지침안을 대한화학요법학회/대한감염학회 춘계학술대회와 대한화학요법학회 연수강좌에서 발표하였고, 발표회에서 논의된 내용을 추가적인 지침 개발위원회의 회의를 거쳐 수정, 보완하였다. 수정된 최종안은 대한화학요법학회, 대한감염학회, 대한비뇨기과학회, 대한요로생식기감염학회, 대한신장학회의 검토와 승인을 받았다.

9) 지원

이 지침은 2017년 질병관리본부의 정책연구 용역사업(2017-E21002-00)의 지원으로 이루어졌다. 지침 개발에 참여한 지침개발 위원들은 정부기관, 학술단체, 제약회사 및 이익단체로부터 어떠한 영향을 받지 않았다.

질환별 임상진료 지침

1. 무증상 세균뇨

1) 배경 및 국내 역학

무증상 세균뇨는 흔하다. 세균뇨는 해부학적 혹은 기능적 요로계 장애가 있는 사람에서 빈도가 높으나 정상인에서도 종종 발견된다 [2,3]. 대개의 경우 무증상 세균뇨는 부차적인 영향이 없다[4]. 오히려 무증상 세균뇨에 대한 불필요한 항생제 투여로 항생제 내성이 유발되고 약제 부작용이 나타나기도 한다[5]. 그러므로 항생제 치료는 이득이 밝혀진 사람으로 제한해야 한다[5].

여성은 나이가 들면서 무증상 세균뇨의 빈도가 증가하는데, 80세 이

상 여성은 20%에서 무증상 세균뇨가 발견된다. 건강한 남성은 무증상 세균뇨가 60세까지는 드물다가 80세 이상에서 5~10% 발견된다. 무증상 세균뇨는 신부전이나 고혈압 혹은 사망률 증가를 초래하지 않는다[6].

지역사회 거주 여성에서 무증상 세균뇨의 원인 미생물로 대장균 (*Escherichia coli*)이 가장 흔하고 그 외에 *Klebsiella pneumoniae* 등의 장내세균속과 장알균 등의 그람양성균이 흔히 분리된다[7, 8]. 국내 입원 환자에서도 무증상 세균뇨는 대장균이 가장 흔하기는 하지만 지역사회 거주민보다는 빈도가 낮고, 중환자실에서는 항생제에 내성인 장알균, *K. pneumoniae*, *Pseudomonas aeruginosa*, *Candida* 등도 자주 분리된다[9, 10].

2) 진단

무증상 세균뇨란 요로감염 증상이나 징후 없이 소변에 세균이 의미 있는 정도로 존재하는 것을 의미한다. 의미 있는 세균뇨는 여성에서 청결채취 중간뇨 1 mL당 10<sup>5</sup>개 이상 2회 연속 같은 세균이 배양되는 것으로 정의한다[2,3]. 남성에서는 청결채취 중간뇨 1 mL당 10<sup>5</sup>개 이상 한번이라도 배양되어야 하고, 남녀 모두 도뇨검체에서는 1 mL당 10<sup>2</sup>개 이상 배양되면 된다[2,3].

3) 핵심 질문별 권고안

- ① 임신부에서 무증상 세균뇨를 치료하면 증상성 요로감염이나 출산 전후 합병증(perinatal complication) 발생을 예방할 수 있는가?

<권고 사항>  
임신 초기 여성에서 세균뇨를 선별하여 치료해야 한다 (근거수준: 낮음, 권고수준: 강함).

<근거 요약>

2005년 발행된 미국감염학회 지침에 따르면 임신 초기 여성에서 세균뇨를 선별하여 치료해야 한다[2]. 그러나, 최근 들어 임신부에서 무증상 세균뇨를 선별하는 것에 회의적인 연구 결과가 제시되고 있다. 무증상 세균뇨가 있는 임신부 2,302명, 14개 무작위대조시험에 대한 2015년 메타분석/체계분석 결과 위약 대조군에 비해 항생제 치료

표 3. 근거 및 권고 수준 변환

| 2011년 지침 근거수준  |                                    | 근거수준 변환                    |
|----------------|------------------------------------|----------------------------|
| 1              | 하나 이상의 무작위 대조연구의 근거가 있음            | High                       |
| 2              | 무작위 연구는 아니지만 잘 고안된 임상연구를 통한 근거가 있음 | Moderate                   |
| 3              | 임상 경험이나 위원회 보고서를 기초로 한 전문가들의 견해    | Very Low                   |
| 2011년 지침 권고 수준 |                                    | 권고수준 변환                    |
| A              | 권장할 만한 충분한 근거가 있다                  | Strong                     |
| B              | 충분한 근거가 있는 것은 아니지만 고려할 정도의 근거는 있다  | Weak                       |
| C              | 권장하기에 근거가 불충분하다                    | No Specific Recommendation |

군에서 신우신염의 발생, 저체중아의 출생과 조기분만 등이 통계적으로 의미 있게 줄었으나, 질적 수준이 낮은 연구 결과를 바탕으로 한 분석이라고 저자들이 강조하였다[11]. 네덜란드에서 시행된 무작위 대조시험 결과 임신부에서 무증상 세균뇨가 신우신염 발생과 연관은 있었으나 위험도는 낮았다[12]. 또한 이 연구에서 무증상 세균뇨는 조기분만과 연관이 없는 것으로 보고하였다. 최근 임신부에서 무증상 세균뇨의 선별은 이득이 없는 것으로 보고한 체계분석 결과도 발표되었다[13]. 이러한 연구 결과들에 따라 임신 초기 세균뇨의 선별과 치료에 대한 근거수준은 낮추었으나 임신부와 태아 건강의 중요성을 감안하여 유사한 연구 결과들이 추가되기 전까지 권고 수준은 강함으로 유지하였다.

② 비임신 여성에서 무증상 세균뇨를 치료하면 증상성 요로감염 발생을 예방할 수 있는가?

**<권고 사항>**  
비임신 여성에서 무증상 세균뇨의 선별과 치료를 권하지 않는다 (근거수준: 높음, 권고수준: 강함).

〈근거 요약〉

무증상 세균뇨가 있는 젊은 여성 673명을 대상으로 한 무작위대조 시험에서 3개월 후 치료군과 대조군 사이에 세균뇨의 차이가 없었으나 6개월 후에는 치료군에서 세균뇨 재발이 더 많았다(29.7% versus 7.6%,  $P < 0.0001$ ) [14]. 또한 연속된 무작위대조시험에서 무증상 세균뇨에 대해 항생제 치료를 받은 젊은 여성은 나중에 분리된 세균에서 항생제 내성률이 높았다[15]. 무증상 세균뇨는 장기적인 예후(고혈압, 만성 신질환, 비노생식기계 암, 생존기간 감소)에 영향을 미치지 않았다[2]. 무증상 세균뇨를 치료하더라도 증상성 요로감염 횟수가 줄지도 않았고 무증상 세균뇨의 발생도 막지 못하였다[2]. 미국감염학회와 유럽비뇨기과학회 지침에 따르면 폐경 전 비임신 여성에서 무증상 세균뇨를 선별하거나 치료할 필요가 없다[2, 3]. 무증상 세균뇨가 있는, 거동이 가능한 노인 여성을 대상으로 한 무작위대조시험에서 항생제(trimethoprim-sulfamethoxazole 1회 혹은 cefaclor 3일) 치료군은 대조군에 비해 6개월 후 세균뇨가 줄었으나(36.4% versus 65.5%,  $P = 0.004$ ) 6개월 동안 증상성 요로감염의 발생은 비슷하였다(7.9% versus 16.4%,  $P = 0.18$ ). 즉, 항생제 치료를 해도 증상성 요로감염의 발생에 차이가 없었다[16]. 미국감염학회와 유럽비뇨기과학회도 지역사회에 거주하는 노인 여성에서 무증상 세균뇨의 선별과 치료를 권장하지 않고 있다[2, 3].

③ 양로원에 거주하는 여성에서 무증상 세균뇨를 치료하면 증상성 요로감염 발생을 예방할 수 있는가?

**<권고 사항>**  
양로원 거주 여성에서 무증상 세균뇨의 선별과 치료를 권하지 않는다 (근거수준: 높음, 권고수준: 강함).

〈근거 요약〉

양로원 거주 노인에서 무증상 세균뇨를 항생제로 치료한 전향적 대조시험에 따르면 무증상 세균뇨를 선별하고 치료하는 것에 이득이 없었다[17-19]. 항생제 치료로 증상이 있는 요로감염의 발생이 줄지 않았고 생존이 연장되지도 않았으며 만성적인 비노생식기 증상이 호전되지도 않았다[17-19]. 오히려 항생제 치료에 따른 부작용만 늘었으며, 나중에 항생제 내성균에 다시 감염되었다[18]. 미국감염학회와 유럽비뇨기과학회도 양로원 거주 여성에서 무증상 세균뇨의 선별과 치료를 권장하지 않고 있다[2, 3].

④ 당뇨병이 있는 여성에서 무증상 세균뇨를 치료하면 증상성 요로감염 발생을 예방할 수 있는가?

**<권고 사항>**  
당뇨병 여성에서 무증상 세균뇨의 선별과 치료를 권하지 않는다 (근거수준: 높음, 권고수준: 강함).

〈근거 요약〉

무증상 세균뇨가 있는 당뇨병 여성에서 3개월 간격으로 최대 3년 동안 추적한 전향적 무작위대조시험에서 항생제 치료는 이득이 없었다[20]. 즉, 항생제 치료로 증상성 요로감염 발생을 지연시키거나 줄이지 못하였고 요로감염이든 다른 이유든 입원 횟수를 줄이지 못했다. 오히려 항생제 치료군은 어떤 이유로든 항생제 투여일이 5배 더 많았으며 항생제로 인한 약물 부작용이 통계적으로 의미 있게 더 많았다. 당뇨병 여성을 대상으로 한 다른 무작위 대조시험에서도 무증상 세균뇨에 대한 항생제 치료는 세균노 지속과 특정 균주의 보균을 장기간 줄일 수 있었으나 치료 후 대부분 새로 집락되었다[21]. 미국감염학회와 유럽비뇨기과학회는 당뇨병 여성에서 무증상 세균뇨의 선별과 치료를 권장하지 않고 있다[2, 3].

⑤ 척수손상 환자에서 무증상 세균뇨를 치료하면 증상성 요로감염의 발생을 예방할 수 있는가?

**<권고 사항>**  
척수손상 환자에서 무증상 세균뇨의 선별과 치료를 권하지 않는다 (근거수준: 낮음, 권고수준: 강함).

〈근거 요약〉

무증상 세균뇨가 있고, 간헐도뇨를 하는 척수손상 환자를 대상으로 한 소규모 대조시험과 전향적 무작위시험에서 무증상 세균뇨를 항생제로 치료하더라도 증상이 있는 요로감염 발생과 세균노 재발이 항생제 치료군과 위약 대조군 사이에 차이가 없었다[22, 23]. 미국감염학회와 유럽비뇨기과학회는 척수손상 환자에서 무증상 세균뇨의 선별과 치료를 권장하지 않고 있다[2, 3].



- ⑥ 유치 도뇨관이 있는 환자에서 무증상 세균뇨를 치료하면 증상성 요로감염 발생을 예방할 수 있는가?

#### <권고 사항>

유치 도뇨관이 있는 환자에서 무증상 세균뇨의 선별과 치료를 권하지 않는다 (근거수준: 낮음, 권고수준: 강함).

#### <근거 요약>

유치 도뇨관이 있는 중환자실 환자에서 무증상 세균뇨를 치료하더라도 증상이 있는 요로감염의 발생이 감소하지 않는다[24-26]. 미국 감염학회와 유럽비뇨기과학회도 유치 도뇨관이 있는 환자에서 무증상 세균뇨의 선별과 치료를 권장하지 않고 있다[2, 3, 27].

- ⑦ 요도경유 전립선절제술(TUR-P) 등과 같은 점막출혈이 예상되는 비뇨기과 시술을 받을 환자에서 무증상 세균뇨를 치료하면 감염성 합병증을 예방할 수 있는가?

#### <권고 사항>

점막출혈이 예상되는 비뇨기과 시술을 받을 경우 시술 전에 무증상 세균뇨를 선별하여 치료하기를 권한다 (근거수준: 높음, 권고수준: 강함).

#### <근거 요약>

요도경유 전립선절제술(TUR-P)을 받는 세균뇨가 있는 남성을 대상으로 한 4개 무작위대조시험 결과 항균제 투여가 감염성 합병증을 예방하는데 효과적이었다[28-31]. 미국감염학회와 유럽비뇨기과학회는 요도경유 전립선절제술을 받을 예정인 환자에게서 무증상 세균뇨를 선별하여 치료할 것을 권장하고 있다[2, 3]. 점막출혈을 일으킬 가능성이 높은 다른 비뇨기과 시술에서도 감염성 합병증이 발생할 위험이 있다[32]. 그러므로 점막 출혈을 일으킬 가능성이 높은 다른 비뇨기과 시술을 하기 전에도 무증상 세균뇨를 선별하여 치료하기를 권한다. 항생제 투여는 시술 전날 저녁 혹은 직전에 시작하고 [32, 33] 시술 직후 투여를 종료한다[30, 31, 33].

## 2. 단순 방광염

### 1) 배경 및 국내 역학

급성 단순 요로감염은 약 10%의 여성이 1년에 최소 1회 이상을 겪게 되며, 약 60%의 여성이 평생에 걸쳐 최소 한 번은 겪게 되는 다빈도 질환이다[34]. 약 5%에서 재발을 겪게 되며, 특히 1년 이내 재발되는 경우가 약 44%에 이른다. 이러한 이유로 급성 단순 요로감염은 항생제 처방 다빈도 질환 중 하나이다[35]. 실제로 미국과 유럽 국가에서는 외래에서 사용하는 항생제의 약 15%가 요로감염으로 인해 처방된다[36].

요로감염은 감염 부위에 따라 상부요로감염(신우신염)과 하부요

로감염(방광염)으로 분류하며, 비뇨기계의 구조적 이상이나 신경학적 이상이 없는 상태에서 발생한 요로감염을 단순 요로감염으로, 그렇지 않은 경우를 복잡성 요로감염으로 분류한다. 이 장에서는 단순 방광염, 특히 여성에서의 단순 방광염을 대상으로 다루고자 한다.

단순 방광염의 주요 원인균은 요로병원성 대장균(이하, 대장균)으로 전체 원인균의 70-83%를 차지한다[37-39]. 따라서 단순 방광염의 경험적 치료는 대장균을 대상으로 하고, 대장균의 내성 양상에 따라 적합한 경험적 항생제를 선정할 수 있어야 한다. 단순 방광염에서 분리된 대장균을 대상으로 한 최근의 국내 항생제 감수성 결과는 아래 표 4와 같다.

Ciprofloxacin과 TMP/SMX의 내성률 추이를 살펴보면, 급성 방광염에 대해 경험적 항생제로 사용이 증가한 ciprofloxacin은 내성이 증가하는 반면, 사용량이 감소한 TMP/SMX은 내성률이 감소하는 양상이다[40, 41] (그림 1).

내성 양상은 지역적으로도 차이를 보인다 [42]. 2006년 방광염에서 분리된 대장균의 ciprofloxacin 내성률은 서울 24.6%, 경상도 40.0%, 경기도 14.7%, 충청전라도 32.1%로 차이를 보였다[40]. 유사한 시기에 전라남도를 대상으로 한 연구에서는 24.6%의 내성률을 보였다 [43]. 따라서 경험적 항생제의 선택은 시기별, 지역별 내성률 자료를 바탕으로 이루어져야 한다.

### 2) 진단

급성 방광염은 임상 증상과 함께 농도가 있을 때 진단할 수 있다 [44].

#### (1) 임상적 진단

단순 방광염 진단 시 환자의 병력이 가장 중요하다. 질 분비물이나 통증이 없는 상태에서, 새로 생긴 빈뇨, 배뇨통, 긴박뇨 등이 있을 때 급성 방광염 진단의 양성예측률은 90%에 이른다[45]. 혈뇨가 동반되기도 하며, 뇨실금을 동반할 수 있다. 고령에서는 인지기능 장애로 인해 임상 증상의 호소를 못하거나, 하복부 통증 등의 전신 증상으로 나타나는 경우도 있어 진단에 주의를 요한다[46].

#### (2) 검사실적 진단

농뇨는 원심분리하지 않은 소변의 고배율 검사에서 백혈구가 10개 이상일 때 정의할 수 있다[3, 47]. 농뇨와 세균뇨를 평가하기 위해 시험지 검사법(urine dipstick test)이나 현미경 관찰 등의 요검사를 시행할 수 있다. 소변배양은 세균뇨를 확인하기 위해 시행하며, 배양된 병원체의 항생제 감수성 검사를 시행할 수 있다. 증상이 있는 여성의 경우 중간소변에서  $10^3$  집락형성단위/mL 이상의 집락 수가 있을 때 진단적 의미를 갖는다[48]. 다만, 전형적인 증상이 있는 경우 바로 진단하고 치료를 시행할 수 있어 검사실적 진단이 반드시 필요하지는 않다.

표 4. 국내 방광염 환자에서 분리된 대장균의 항생제 감수성 결과(%)

| Year of study                 | 2006/2002 [40] | 2008 [38] | 2009 [37] | 2010-2014 [41] | 2013-2015[42] |
|-------------------------------|----------------|-----------|-----------|----------------|---------------|
| Antimicrobial agents          |                |           |           |                |               |
| Ampicillin                    | 35.2/37.2      | 46.7      | 38.5      | 35.3           | 30.4          |
| Ampicillin/sulbactam          | 52.4/44.5      | 83.5      | -         | -              | -             |
| Amoxicillin/clavulanate       | -              | -         | 80.7      | 84.5           | 64.6          |
| Piperacillin/tazobactam       | 98.6/97.4      | 98.8      | -         | 96             | 94.8          |
| Ciprofloxacin                 | 76.6/84.8      | 79.6      | 74.6      | 58.3           | 73.6          |
| Gatifloxacin                  | 78.2/NA        | -         | -         | -              | -             |
| Cefazolin                     | 92.4/92.2      | -         | 86        | 83.8           | 72.1          |
| Amikacin                      | 99.5/99.0      | 99.1      | 99.5      | 100            | 99.5          |
| Gentamicin                    | 77.6/81.7      | 79.8      | 76.6      | 69.1           | 72.3          |
| Tobramycin                    | 78.2/85.9      | 82.9      | 80.9      | 74.8           | -             |
| Trimethoprim/sulfamethoxazole | 70.6/61.3      | 67        | 67.3      | 66             | 61.6          |
| Cefuroxime                    | -              | -         | 86.1      | -              | -             |
| Ceftriaxone                   | -              | 95.3      | 94.7      | -              | -             |
| Ertapenem                     | -              | -         | -         | 100            | 99.8          |
| Imipenem                      | -              | -         | -         | 100            | 99.5          |
| Cefoxitin                     | -              | -         | -         | 92.9           | 89.8          |
| Cefepime                      | -              | 95.3      | -         | 92.3           | 77.6          |
| Ceftazidime                   | -              | -         | -         | 93.1           | 76.1          |
| Cefotaxime                    | -              | 95.1      | -         | 87.3           | 75.8          |
| Aztreonam                     | -              | 97.1      | -         | 90.7           | -             |

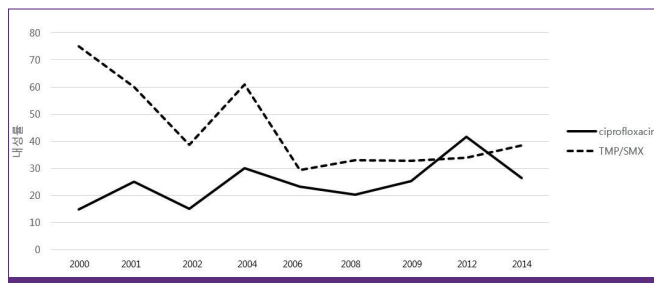

그림 1. 방광염에서 분리된 대장균의 ciprofloxacin과 TMP/SMX에 대한 내성을 변화

3) 핵심 질문별 권고안

- ① 단순 방광염 환자의 경험적 치료 시 항생제 종류와 사용기간에 따라 경과에 차이가 있는가?

**<권고 사항>**  
 외래에서 단순 방광염 환자를 치료할 때 다음의 항생제를 사용하는 것이 좋은 치료 성과와 예후를 위해 적절하다.  
 ㉠ Nitrofurantoin monohydrate/macrocrystals 100 mg 하루 2회씩 5일 이상 투여할 것을 권고한다(근거수준: 높음, 권고수준: 강함).

- ㉡ Fosfomycin trometamol 3 g 단회 사용을 권고한다(근거수준: 높음, 권고수준: 강함).
- ㉢ Pivmecillinam 400 mg을 하루 3회씩, 3일 이상 투여할 것을 권고한다(근거수준: 높음, 권고수준: 강함).
- ㉣ 경구용 fluoroquinolone 계열 항생제를 3일 이상 투여할 것을 권고한다 (근거수준: 낮음, 권고수준: 강함).
- ㉤ Beta-lactam 계열로는 경구 세팔로스포린을 사용할 수 있으며, cefpodoxime, cefdinir, cefcapene, cefditoren, cefixime 등을 5일 이상 투여하도록 권고한다(근거수준: 매우 낮음, 권고수준: 강함).

<근거 요약>

A. 외래에서의 경험적 항생제

경험적 항생제 선택 시에는 환자 개개인의 상황을 고려하고, 지역 사회 내성률, 비용, 치료 실패 가능성 등을 반영하여 선택해야 한다. 이 지침에서 권장하는 항생제는 지역사회에서 발생한 단순 급성 방광염으로 진단된, 내성균 획득의 위험이 낮은 여성을 대상으로 한다. 치료에 반응이 없는 경우에는 내성의 가능성에 대해 재평가하여 적절한 항생제를 사용한다(표 5).

외국 지침을 그대로 적용했을 때 국내 단순 방광염에 사용이 가능한 항생제로는 fosfomycin이 적절하다. 국내 현실을 반영했을 때, nitrofurantoin이나 pivmecillinam과 같은 1차 약제가 도입되기 전까지

표 5. 국내 급성 단순 방광염에서 사용이 가능한 경험적 항생제

| 경험적 항생제                           | 용법                           | 최소기간 |
|-----------------------------------|------------------------------|------|
| Fosfomycin                        | 3g 1회                        | 1일   |
| Ciprofloxacin                     | 500 mg 하루 2회<br>250 mg 하루 2회 | 3일   |
| Beta-lactams                      |                              |      |
| Cefpodoxime proxetil              | 100 mg 하루 2회                 | 5일   |
| Cefdinir                          | 100 mg 하루 3회                 | 5일   |
| Cefcapene pivoxil                 | 100 mg 하루 3회                 | 5일   |
| Cefditoren pivoxil                | 100 mg 하루 3회                 | 3일   |
| Cefixime                          | 400 mg 하루 1회<br>200 mg 하루 2회 | 3일   |
| 국내 도입 후                           |                              |      |
| Nitrofurantoin                    | 100 mg 하루 2회                 | 5일   |
| Pivmecillinam                     | 400 mg 하루 3회                 | 3일   |
| 감수성 확인 후                          |                              |      |
| Amoxicillin/clavulante            | 500/125 mg 하루 2회             | 7일   |
| Trimethoprim/<br>sulfamethoxazole | 160/800 mg 하루 2회             | 3일   |

는 플루오로퀴놀론(fluoroquinolone)과 경구 베타락탐(beta-lactam), 특히 세팔로스포린 계열 항생제의 사용이 불가피하다.

#### (a) 플루오로퀴놀론(Fluoroquinolones)

플루오로퀴놀론(Fluoroquinolone)은 다른 항생제에 대해 내성률이 높은 지역에서 단순 방광염의 1차 약제로 사용되어 왔다. 특히 우리나라의 경우 대장균의 TMP/SMX에 대한 내성률이 높아 플루오로퀴놀론이 경험적 항생제로의 선호도가 높은 편이다.

플루오로퀴놀론과 TMP/SMX 비교에서 두 약제는 단기/장기 증상 개선에 유사한 효과를 보였고, 플루오로퀴놀론과 베타-락탐 항생제의 비교에서 플루오로퀴놀론이 단기 증상 개선과 세균학적 치료에서 더 효과적이었다[49]. 단순 급성 방광염 치료에 있어 플루오로퀴놀론 간의 임상적 또는 미생물학적 효과의 차이는 없으며, ciprofloxacin, levofloxacin, ofloxacin을 이용한 3일 요법이 사용될 수 있다[50].

안정성 측면에서 약물 이상반응의 발생 빈도나 양상은 플루오로퀴놀론 계열 항생제들간에 차이가 있다. 그러나 플루오로퀴놀론 계열 항생제의 사용시 인대, 근육, 관절, 신경, 중추신경계 등의 이상반응이 보고되어 있으며 이러한 심각한 부작용을 고려하여 미국 FDA는 다른 항생제 사용이 가능한 급성 부비동염, 급성 기관지염, 단순 요로감염에 대해서는 플루오로퀴놀론 계열 항생제를 사용하지 않도록 권고했다[51]. 이에 국내 복지부에서도 ciprofloxacin 경구제제가 단순요로감염에서 1차 약제로 투약시 요양급여를 인정하지 않도록 고시개정이 이루어졌다. 그러나 현재 국내에서는 단순요로감염에서 항생제 내성률을 고려했을 때 1차 경험적 항생제로 사용할 수

있는 nitrofurantoin이나 pivmecillinam 등과 같은 항생제가 원활하게 공급되지 않고 있다. Nitrofurantoin이나 pivmecillinam과 같은 대체 항생제가 국내에 도입되어 원활하게 사용되기 전까지는 실제 진료 현장에서 플루오로퀴놀론을 1차 항생제로 사용하는 것이 불가피한 실정이다.

#### (b) Fosfomycin trometamol

방광염 치료로서 fosfomycin과 다른 항생제의 효과를 비교한 메타분석에서, fosfomycin의 효과는 플루오로퀴놀론, TMP/SMX, 베타-락탐 항생제, nitrofurantoin 등과 유사했고, 부작용은 더 적었다[52].

유럽과 브라질에서 시행된 방광염 원인균의 항생제 내성에 관한 역학 연구에서 대장균이 병원체의 76.7%로 가장 많았으며, 대장균의 fosfomycin에 대한 감수성은 98.1%로 높았다[53]. 또한 ESBL 생성균이나 AmpC 생성균, carbapenem 비감수성인 다제내성 대장균도 fosfomycin에 높은 감수성을 보인다[54]. 국내 연구에서도, ciprofloxacin 내성률이 22%, TMP/SMX 내성률이 29.2%인 대장균에서 fosfomycin 내성률은 0%로 높은 감수성을 보였다[55]. 따라서 국내에서도 단순 급성 방광염에서 fosfomycin을 1차 경험적 항생제로 사용하는 것이 적절하다.

#### (c) 베타-락탐 (Beta-lactams) 항생제

베타-락탐(Beta-lactam)과 nitrofurantoin, 베타-락탐 항생제와 TMP/SMX 비교 연구에서 각각 두 군간에 증상 개선이나 세균학적 치료 효과의 차이는 없었다. 베타-락탐 항생제의 intention-to-treat 분석에서는 베타-락탐 항생제보다 플루오로퀴놀론이 더 효과적이었다[49].

국내 내성률을 고려했을 때 경험적으로 사용할 수 있는 베타-락탐 항생제는 세팔로스포린(cephalosporins) 계열이다. 그 중에서도 2세대와 3세대 세팔로스포린 사용을 고려할 수 있으며, 이들은 요로감염에 대한 적응증을 갖는다. 경구 세팔로스포린을 대상으로 한 효과의 비교 연구에서, cefpodoxime은 ciprofloxacin과 비교했을 때 효과가 열등하지만[56], TMP/SMX와 비교 시에 차이가 없었다[57]. Cefixime의 경우 ofloxacin과 ciprofloxacin을 각각 비교한 연구에서 치료 효과의 차이가 없었다[58, 59] 경구 항생제에 대한 항생제 감수성 결과는 2008-2009년 자료에서 cefuroxime 감수성 86.1%, cefpodoxime 감수성 93.6%였으며, 당시 amoxicillin/clavulanate 감수성은 80.7%였다[37]. 2007-2008년 자료에서 cefcapene pivoxil에 대한 감수성은 88.9%였으며, 100 mg 하루 3회씩 총 5일간 투여 시 증상 개선과 세균학적 치료가 모두 유효했다[60]. 2004-2005년 자료에서 cefixime 감수성은 87.3%로 보고되었다[61]. 단순 방광염에서 원인균의 cefaclor에 대한 감수성 자료는 없으나 2003년 지역사회 획득 요로감염에서 대장균의 cefaclor와 cefuroxime에 대한 감수성은 각각 90%와 90%로 보고된 바 있어 감수성 정도를 유추해 볼 수 있다[62]. 반면, 2004-2005년 소아의 요로감염에서 동정된 대장균의 cefaclor에 대한 감수성은 6.4%로 매우 낮았다[63]. Cefaclor의 경우 경험적 항생제로 사용하기 위해

서는 추가적인 연구 자료가 필요하다.

국내에서 분리된 대장균의 amoxicillin/clavulanate에 대한 내성률은 20-35%로 보고되어 amoxicillin/clavulanate를 1차 경험적 항생제로 권고하기 어려운 실정이다. 다만, 소변 배양검사 결과에서 감수성이 확인되면 사용할 수 있다.

(d) Trimethoprim/sulfamethoxazole (TMP/SMX)

현재 국내 방광염 환자에 대해서 TMP/SMX는 원인균의 감수성 결과를 확인한 후에 사용이 가능하다. 과거 TMP/SMX에 대한 지역사회 내성률이 20% 미만일 경우 값비싼 플루오로퀴놀론 계열 항생제들 대신 1차 약제로 사용하도록 권장되던 표준 치료제였다[64]. 원인균이 감수성을 보이는 경우 TMP/SMX은 단기적인 증상 개선과 미생물학적 치료 측면에서 플루오로퀴놀론 만큼 효과적이다[49]. Nitrofurantoin과의 비교에서 증상 개선이나 미생물학적 치료 측면에서 효과가 유사했다.

지역사회 내성률이 20% 미만일 경우 경험적 항생제로서 사용을 권장한다. 그러나 국내의 최근 항생제 감수성 결과를 보면, TMP/SMX에 대해 약 35% 이상의 내성률이 지속적으로 보고되고 있어 경험적 항생제로 권고하기 어려운 실정이다[65]. 다만, 소변 배양검사 결과에서 감수성이 확인되면 사용할 수 있다.

B. 국내 도입이 필요한 항생제

(a) Nitrofurantoin

국내 대장균의 nitrofurantoin에 대한 내성률은 0.6%로 매우 낮다[55]. 따라서 현실적으로 사용이 가능한 조건이나 국내에 도입되지 않아 사용할 수 없는 상태이다. 단순 급성 방광염에 대한 항생제 수요와 원인균의 내성률 증가 추세를 고려할 때 nitrofurantoin의 국내 도입이 필요하다.

(b) Pivmecillinam

여러 지침에서 1차 경험적 항생제로 사용을 권장하는 약제로, 국내에서는 사용할 수 없는 상태이다. 최근 단순 방광염에 대한 pivmecillinam의 용량과 사용기간에 대한 메타분석 결과가 발표되었다[66]. 현재 미국 지침에서는 400 mg 하루 두 번씩 3-7일을, 유럽 지침에서는 400 mg 하루 세 번씩 3일을 권장한다. 메타분석 결과에 따르면, 아직까지 pivmecillinam의 용량과 빈도, 사용 기간을 정하기에는 자료가 부족하여 추가 연구가 필요한 상태이다. 국내에 도입될 경우 임상 적용에 주의가 필요하다.

C. 단순 방광염에 대한 항생제 사용 기간

단순 방광염에 대한 치료 기간은 각 항생제 별로 다르다. 동일 항생제에 대해 며칠의 치료가 가장 효과적일지에 대한 두 개의 Cochrane 분석이 있다. 여성의 단순 요로감염에서 3일 치료와 5-10일 치료를 비교했을 때 증상개선에서는 차이가 없었으나 세균학적 치료 면에서는

5-10일이 효과적이었다[67]. 반면, 부작용 또한 5-10일 군에서 통계적으로 의미 있게 자주 발생하여 세균의 박멸이 반드시 필요한 경우에만 5-10일 치료를 고려할 수 있다. 60세 이상의 고령에서 단순 방광염에 대한 항생제 치료 기간을 1회 치료, 3-6일의 단기와 7-14일의 장기 치료로 비교했을 때, 단기치료와 장기치료는 치료 효과 면에서 차이가 없었다[68]. 단순 방광염에 대해 Cefditoren pivoxil 3일 치료와 7일 치료를 비교했을 때 임상적, 세균학적 치료 면에서 차이가 없었다[69].

항생제 종류와 무관하게 5일 이하 치료와 5일 초과 치료에 따른 재발여부를 분석했을 때에도, 5일 초과와 장기 치료가 재발률을 낮추는 효과는 없었다[70].

이상의 결과를 종합했을 때 단순 방광염의 치료는 3일 또는 5일 미만의 단기 치료가 가능하며, 일부 경우에서 5일 이상의 사용을 고려해볼 수 있다. 특히 세균학적 치료가 반드시 필요한 경우에는 3일 이상의 치료가 더 효과적일 수 있다[71]. 상부 요로감염이 의심되는 경우나 복잡성 요로감염의 가능성이 있는 경우에는 환자를 재평가하여 항생제 사용 기간을 결정한다.

② 단순 방광염 환자에서 소변배양 검사는 필요한가?

<권고 사항>

- ㉠ 신우신염이 의심되는 경우, 비전형적인 증상이 있는 경우, 임신부인 경우, 남성의 요로감염이 의심되는 경우, 치료 종료 후 2-4주 이내에 증상이 호전되지 않거나 재발한 경우에는 소변배양 검사가 필요하다 (근거수준: 낮음, 권고수준: 강함).
- ㉢ 국내의 경우, 요로감염 원인균의 항생제 내성률 증가로 인해 소변배양 검사를 시행하는 것이 적절하다 (근거수준: 매우 낮음, 권고수준: 강함).

<근거 요약>

소변배양이 반드시 필요한 상황은 다음과 같다. 신우신염이 의심되는 경우, 비전형적인 증상이 있는 경우, 임신부인 경우, 남성의 요로감염이 의심되는 경우, 그리고 치료 종료 후 2-4주 이내에 증상이 호전되지 않거나 재발한 경우 등에서 내성균에 의한 감염 가능성 또는 항생제 감수성 결과를 확인하기 위해 소변배양이 권장된다.

기존 가이드라인에 따르면 전형적인 증상을 가진 단순 방광염 환자는 소변배양 없이 바로 경험적 치료를 시행하도록 권장된다. 이는 관련 문헌 검토 시 근거수준이 낮은, 또는 매우 낮은 상태로 평가되는 요소이다. 근거로 활용되는 문헌에 따르면 외래에서 소변배양 검사를 할 경우 약 30%의 오염률이 동반되며[72], 소변보기 전 소독 여부는 오염에 영향을 미치지 않는다[73]. 1997년 미국의 비용-유용성(cost-utility) 분석에서, 7일간 경험적 항생제를 사용하는 것이 다른 검사를 시행한 뒤 치료여부를 결정한 것보다 비용-효과적인 것으로 확인되었다[74]. 즉, 치료 전략과 관련하여 항생제 비용, 진료 비용, 검사 비용 등을 고려한 비용-효과 측면에서 소변배양 검사가 반드시 필요한 것은 아니라는 의견이었다[75].



그러나 급성 단순 방광염에 대해 3일 경험적 항생제 치료로 변경된 점과 외래 진료비, 시험지 검사법, 또는 소변배양 비용이 비교적 저렴한 국내의 상황에서 미국 및 다른 유럽국가와 동일한 비용-유용성을 적용하기는 어렵다. 오히려 최근 자료에 따르면, 지역사회 획득 요로 감염을 유발한 대장균에서 ESBL을 생성하는 비율이 24.6%에 이르는 것으로 보고되어[42] 소변배양을 통해 원인균의 항생제 내성 양상을 확인하지 않고 경험적 항생제만을 유지하는 것이 치료와 예후의 관점에서 적절한지 체계적인 분석이 필요한 시점이다.

또한 기존 가이드라인은 급성 방광염에서 원인균의 지역사회 내 성률이 20% 미만인 항생제를 경험적 항생제로 선정하여 사용하도록 권장하고 있다[64]. 항생제 내성률이 증가하고 있는 국내 현실에서 소변배양검사를 하지 않고 경험적으로만 치료했을 경우 치료 실패의 가능성이 높으며, 배양결과에 따른 내성률 추이 자료가 있어야 경험적인 항생제 선택이 가능할 것이다. 따라서 단순 급성 방광염이라 하더라도 소변배양 검사를 하는 것이 국내 현실에서는 필요하다.

### 3. 단순 급성 신우신염

#### 1) 배경 및 국내 역학

요로감염증은 가장 흔한 세균감염 질환 중 하나로 여성의 40~50%는 일생 동안 적어도 1번 이상 요로감염증을 경험하는 것으로 보고되어 있다[76, 77]. 단순 또는 비복잡성 요로감염은 급성 방광염 또는 신우신염의 소견이 요로계에 구조적 또는 기능적 이상이 없는 건강한 폐경전 여성에서 발생한 것으로 정의한다[78].

급성신우신염 또는 상부요로감염은 신장에 발생한 감염으로 배뇨시 통증, 발열, 오한, 옆구리통증, 구역, 구토 등의 증상으로 나타난다. 국내의 발생률은 연구에 따르면 인구 만 명당 35.7명 정도이고[79], 미국에서는 27.6명으로 보고되었다[80]. 전세계적인 유행률과 발생률은 알려져 있지 않으나, 주로 여름에 그 발생률이 가장 높은 것으로 알려져 있다[81]. 여자가 남자에 비해 급성신우신염으로 입원을 다섯 배 더 많이 하는 것으로 보고되었다[82]. 급성신우신염은 대부분 방광내의 세균이 요관을 통해 신장을 침범하여 발생하며, 혈액내로 전파되기도 한다[78]. 가장 빈번히 분리되는 원인균은 대장균(56~85%)

이고, 다른 원인균으로는 *Enterococcus faecalis*, *Klebsiella pneumoniae*, *Proteus mirabilis* 등이 있다 [80, 83, 84]. 국내에서 가장 흔한 원인균은 대장균(*E. coli*)이고, 그 외에 *K. pneumoniae*, *P. mirabilis*, *Enterococcus spp.*, *Staphylococcus saprophyticus* 등이 분리된다[40, 85-89]. 표 6과 같이 국내에서 급성 신우신염 환자에서 분리된 대장균의 ciprofloxacin 과 TMP-SMX의 감수성은 점차 감소하여 최근 보고에 따르면 각각 78.7%와 72.2%로 미국의 82.9%와 75.8%보다 낮은 것으로 보고되었다[90, 91].

#### 2) 진단

급성신우신염은 상부요로감염 증상과 농뇨 (고배울검사에서 백혈구 10개 이상)가 특징적이다. 급성신우신염이 의심되는 모든 경우에 요의 그람염색과 배양검사가 실시되어야 한다[78, 88]. 혈액 배양검사는 꼭 실시해야 되는 것은 아니지만 도움이 된다[44, 88]. 정상적으로 깨끗하게 채취한 중간뇨의 경우 요배양 양성의 표준 정의는 10<sup>5</sup> 집락형성단위(colony forming unit, CFU)/mL 이상이다. 하지만 이 기준으로는 특이도는 높으나 민감도는 낮아서 대장균(*E. coli*), *S. saprophyticus*, *Proteus spp.*에 의한 방광염에서 30~50%는 10<sup>2</sup>~10<sup>4</sup> CFU/mL 가 배양되어 실제 임상에 적용하는 데 주의가 필요하다[92]. 특히 대부분의 검사실에서는 요배양 검사 시 10<sup>4</sup> CFU/mL 이하의 균주는 정량화하지 않으므로 요로증상이 있는 여성에서 “동정된 균주 없음(no growth)”의 보고를 해석하는 데 주의가 필요하다[78]. 균혈증을 동반한 급성신우신염 환자의 80%는 10<sup>5</sup> CFU/mL 이상, 10~15%는 10<sup>4</sup>~10<sup>5</sup> CFU/mL의 세균을 보이는데, 이를 근거로 중간뇨에서 10<sup>4</sup> CFU/mL 이상의 세균이 자란 경우를 세균뇨의 진단 기준으로 정의하면 90~95%의 민감도를 가진다[92].

일반적으로 급성신우신염은 임상 증상과 요검사에 근거하여 진단하므로 복잡성 요로감염이 아닌 경우에는 영상학적 검사가 반드시 필요하지 않으나 항생제 치료 72시간 이후에도 치료에 반응이 없는 경우에는 영상학적 검사가 필요하며 이때는 복부 컴퓨터단층촬영검사가 유용한 것으로 보고되어 있다[93].

표 6. 국내 급성 신우신염 환자에서 분리된 대장균의 항생제 감수성 결과(%)

|                          | 항생제 감수성(%) |       |       |       |        |       |       |       |
|--------------------------|------------|-------|-------|-------|--------|-------|-------|-------|
|                          | AMK        | AMP   | SXT   | GEN   | CIP    | CFZ   | CFU   | CTX   |
| Wie, et al., 2002 [87]   | 99.2%      | NA    | 63.3% | 81.8% | 92.5%  | 41.7% | 99.2% | 99.2% |
| Hwang, et al., 2003 [86] | NA         | 31%   | 42.6% | 83.6% | 88.5%  | NA    | NA    | 100%  |
| Wie, et al., 2007 [85]   | 98.7%      | 38.3% | 62.1% | 81.3% | 86.3%  | NA    | 97.3% | 97.3% |
| Kim, et al., 2008 [40]   | 99.5%      | 35.2% | 70.6% | 77.6% | 76.6%  | 92.4% | NA    | NA    |
| Wie, et al. 2014 [91]    | 97.5%      | 39.4% | 72.2% | 77.4% | 78.7%* | 77.1% | 92.9% | 90.7% |

AMK, amikacin; AMP, ampicillin; SXT, trimethoprim/sulfamethoxazole; GEN, gentamicin; CIP, ciprofloxacin; CFZ, cefazolin; CFU, cefuroxime; CTX, cefotaxime.  
\*Ciprofloxacin or levofloxacin.



3) 핵심 질문별 권고안

① 성인의 단순 급성신우신염에 대한 효과적인 항생제 치료 요법은?

<권고 사항>

- ㉓ 모든 급성 신우신염 환자는 경험적으로 항생제를 투여하기 전에 소변배양 검사를 실시한다(근거수준: 매우 낮음, 권고수준: 강함).
- ㉔ 초기에 투여된 경험적 항생제는 원인 미생물의 항생제 감수성 결과에 따라 조절이 필요하다(근거수준: 매우 낮음, 권고수준: 강함).
- ㉕ 입원이 필요하지 않은 단순 신우신염의 초기 경험적 항생제는 정주용 ceftriaxone 1-2 g 또는 amikacin 1일 용량을 투여한 후, 배양 결과가 확인될 때까지 경구용 fluoroquinolone을 투여한다(근거수준: 매우 낮음, 권고수준: 강함).
- ㉖ 입원이 필요하지 않은 단순 신우신염의 초기 경험적 항생제는 정주용 ciprofloxacin 400 mg을 투여한 후, 배양 결과가 확인될 때까지 경구용 ciprofloxacin(500 mg 하루 2회)을 투여할 수 있다(근거수준: 낮음, 권고수준: 약함).
- ㉗ 배양검사 결과에서 감수성을 보이는 경우, 경구용 항균제로 fluoroquinolone, TMP/SMX, beta-lactam 항생제를 사용할 수 있다(근거수준: 높음, 권고수준: 강함).
- ㉘ 단순 급성신우신염에서 감수성을 보이는 경구용 항생제를 7-14일 투여하는데, ciprofloxacin (500 mg 하루 2회 7일간 또는 서방형 ciprofloxacin 1000 mg 하루 1회 7-14일간) (근거수준: 높음, 권고수준: 강함), levofloxacin (500 mg 하루 1회 7일간 또는 750 mg 하루 1회 5일간) (근거수준: 높음, 권고수준: 강함), TMP/SMX (160/800 mg 하루 2회 14일간) (근거수준: 높음, 권고수준: 강함), 경구용 beta-lactam 항생제 (10-14일간) (근거수준: 매우 낮음, 권고수준: 강함)를 투여한다.
- ㉙ 입원이 필요한 신우신염의 경우 초기 정주용 항생제로 fluoroquinolone (근거수준: 낮음, 권고수준: 약함), aminoglycoside ± ampicillin (근거수준: 낮음, 권고수준: 약함), 2세대 cephalosporin (근거수준: 낮음, 권고수준: 약함), 광범위 cephalosporin (근거수준: 높음, 권고수준: 강함), beta-lactam/beta-lactamase inhibitor ± aminoglycoside (근거수준: 낮음, 권고수준: 약함), aminoglycoside ± beta-lactam (근거수준: 낮음, 권고수준: 약함), carbapenem (근거수준: 낮음, 권고수준: 약함)을 투여할 수 있으며, 해열이 된 후에는 분리된 원인균에 감수성이 있는 경구용 항생제 또는 내성률이 토대로 결정된 경구용 항생제로 변경하여 투여한다(근거수준: 낮음, 권고수준: 강함).
- ㉚ 중증 패혈증이나 패혈 쇼크 등으로 중환자실 입원이 필요한 급성 신우신염 환자에서는 국내 내성률 등을 고려하여 piperacillin/tazobactam 또는 carbapenem을 투여한다(근거수준: 낮음, 권고수준: 강함).

<근거 요약>

- A. 모든 급성 신우신염환자는 경험적 항균제 투여 전에 소변 배양을 실시한다.

소변배양 검사는 세균뇨의 존재를 확인하고 요로감염 원인균의 항균제 감수성 결과를 얻기 위해 시행되는데, 급성신우신염이 의심되는 모든 환자에서 소변배양 검사가 실시되어야 한다[78, 88, 94]. 단순 급성 방광염은 경과가 양호하여 신우신염으로 진행되는 경우가 매우 드물지만, 단순 급성 신우신염은 중증의 질환으로 진행할 수 있어 원인균의 항생제 감수성결과에 따른 적절한 항생제 치료가 필요하다[94].

- B. 초기 경험적 항균제는 원인미생물의 항생제 감수성 결과에 따라 조절이 필요하다.

단순 급성신우신염은 적절하게 치료가 되지 않을 경우 신농양, 패혈 쇼크, 급성신부전을 포함한 신손상 등 중증 질환으로 진행할 수 있다[78, 95]. 따라서 원인균의 항생제 감수성 결과에 따른 적절한 항생제 투여가 병을 치료하고 병의 진행을 최소화하는데 필수적이다. 초기의 경험적 치료는 원인균의 감수성 결과에 따라서 적절하게 조절되어야 한다[94].

- C. 입원이 필요 없는 단순 신우신염의 초기 경험적 치료는 정주용 ceftriaxone 1-2g 또는 amikacin의 1일 용량 투여 후, 배양 결과가 확인될 때까지 경구용 fluoroquinolone을 투여한다.

단순 급성신우신염의 경험적 항생제 사용에 있어서, 원인균이 특정 항생제에 내성이 예상되어서 초기 일반적인 경험적 항생제의 사용을 피하고 좀 더 광범위한 항생제를 사용한 후에 선택적 항생제로 교체하는 치료 전략을 고려하도록하는 특정 항생제의 내성 유병률은 단순방광염의 경우와 비교해 상대적으로 낮다. 현재까지 가장 효과적인 권고 항생제인 fluoroquinolone의 경우 그 임계치는 내성 유병률이 10%로, 그 이상으로 내성 유병률을 보이는 경우 대체 항생제를 초기 경험적으로 사용할 것을 권고하고 있으나 그 근거가 되는 자료는 제한적이어서 전문가의 의견을 토대로 결정되었다[94]. 병원별 내성 현황은 종종 입원환자 또는 복잡성 요로감염이나 반복성 감염 환자로부터 얻은 배양 결과를 반영하여 단순 요로감염 환자들의 내성률을 과대 평가할 수 있다[78]. 국내 급성신우신염 환자로부터 분리된 대장균(*E. coli*)의 항생제 감수성 결과(표 6)도 그 대장균의 선정 기준이 복잡성 요로감염 환자를 포함하고 있어서 fluoroquinolone의 내성률이 단순 신우신염 환자에게서 과대 평가되었을 수 있으나 그 내성률의 증가 추세는 명확하다고 할 수 있다. 이처럼 국내 또는 지역별 요로감염 원인균의 내성 양상이 잘 알려져 있지 않은 경우 적절한 경험적 치료는 초기 지속형 정주 항생제와 광범위 항생제를 사용한 후 감수성 결과를 토대로 선택적 항생제 치료를 하는 것이다[94].

단순 급성신우신염은 현재 외래 기반 치료가 대부분으로[96, 97], 최근 한 연구에서 성인 여성의 급성신우신염의 경우 단지 7%만이 입원치료가 필요하였다[96]. 2011년 미국감염학회(IDSA) 요로감염 진료지침에 따르면 단순 급성신우신염의 외래 기반 경험적 항생제 치료를 위한 경구용 항생제로 단지 fluoroquinolone만 권고하고 있다[94]. 한편, fluoroquinolone 내성 유병률이 10%를 넘는 지역에서는

ceftriaxone 또는 aminoglycoside 1일 용량 투여를 경험적 요법으로 권고하고 있다[94]. 국내 요로감염의 주요 원인균인 대장균(*E. coli*)의 fluoroquinolone 내성률을 고려하여 초기 경험적 치료로 ceftriaxone 1 g 또는 amikacin 1일 용량을 투여한 후 배양 결과가 확인 될 때까지 경구용 fluoroquinolone (ciprofloxacin 500 mg 하루 2회 또는 서방형 ciprofloxacin 1000 mg 하루 1회 또는 levofloxacin 750 mg 하루 1회)을 투여할 수 있다. 배양 결과가 나오면 초기 경험적 항생제는 배양 결과에 따라서 재조정해야 한다(표 7).

D. 입원이 필요 없는 단순 신우신염의 초기 경험적 치료는 정주용 ciprofloxacin 400 mg 투여 후, 배양 결과가 확인될 때까지 경구용 ciprofloxacin (500 mg 하루 2회)을 투여한다.

단순 급성 신우신염을 유발하는 원인균의 fluoroquinolone 내성 유병률이 10%를 넘는 경우에서 초기 경험적 항생제로서 fluoroquinolone과 다른 대체 항생제의 무작위 대조시험은 없으나, 지역사회에서 요로감염을 일으키는 대장균(*E. coli*)의 ciprofloxacin 내성이 약 20%인 국내에서 시행된 단일 기관의 전향적 관찰연구에서 초기 정주용 ciprofloxacin 400 mg을 투여한 후 경구용 ciprofloxacin 500 mg을 하루 2회 7-14일간 투여하였고 배양 결과에 따라서 항생제조정을 하였을 때, ciprofloxacin 감수성군(n=216명) 과 ciprofloxacin 내성군(n=39)의 임상적 치료율은 조기추적관찰(87.0% versus 76.9%,  $P=0.135$ )과 후기추적관찰(98.6% versus 94.0%,  $P=0.177$ )에서 두 군 간에 차이가 없었으나, 미생물학적 치료율은 조기추적관찰(92.4% versus 41.7%,  $P<0.001$ )에서 차이를 보여서 ciprofloxacin 감수성 군이 더 높았다[98]. 비록 조기추적관찰에서 ciprofloxacin 내성군이 미생물학적 치료율이 낮았으나 임상적 치료율에서는 차이가 없었는데, 이것은 다른 부위의 감염과 비교하여 단순 급성신우신염의 중증도는 비교적 낮고, 비록 배양 검사 결과 이후로 늦더라도 적절한 항균제의 투여가 이루어지고, ciprofloxacin의 소변에서 고농도로 유지되는 점으로 설명할 수 있다. Ciprofloxacin 내성 대장균에 의한 단순 급성신우신염 환자에서 감수성 결과에 따라서 적절히 선택적 항생제를 사용한다면, 초기 경험적으로 정주용 ciprofloxacin을 투여한 후 경구용 ciprofloxacin을 투여해 볼 수 있다.

E. 배양 검사 결과 감수성을 보이는 경우 경구용 항생제로

fluoroquinolone, TMP-SMX,  $\beta$ -lactam 항균제를 사용한다.

단순 급성신우신염에서 경구용 항생제 치료 효과를 비교한 연구는 많지 않다. 단순 급성 신우신염 환자 255명을 대상으로 한 무작위 대조시험에서 ciprofloxacin 투여군(500mg 하루 2회 7일간)은 TMP-SMX 투여군(160/800mg 하루 2회 14일간)보다 임상적 치료율(96% versus 83%,  $P=0.002$ )과 미생물학적 치료율(99% versus 89%,  $P=0.004$ )이 더 높았다[99]. 이런 결과는 TMP-SMX에 대한 원인균의 내성률이 더 높았던 점에 기인한다. 따라서 TMP-SMX(160/800mg 하루 2회 14일간)는 감수성을 보이는 경우 경구용 항생제로 사용할 수 있다[100]. 하루 1회 투여가 가능한 fluoroquinolone (서방형 ciprofloxacin 1000 mg 또는 levofloxacin 750mg)도 효과적이다. 경증 또는 중등도의 신우신염환자에서 levofloxacin 750 mg 하루 1회 5일간 투여군은 ciprofloxacin 500 mg 하루 2회 10일간 투여군과 비교하여 임상적 치료율(86.2% versus 80.6%)은 차이가 없었다[101]. 또한 서방형 ciprofloxacin 1000 mg 하루 1회 요법도 ciprofloxacin 500 mg 하루 2회처럼 효과적이었다[102]. 3세대 경구용 cephalosporin (ceftibuten 또는 cefpodoxime proxetil)도 fluoroquinolone을 대체할 수 있는데, fluoroquinolone과 비교하여 임상적 치료율은 비슷하나 원인균의 재발은 3세대 경구용 cephalosporin 이 더 높았다[103, 104].

F. 단순 급성신우신염에서 감수성을 보이는 경구용 항생제는 7-14일 투여하는데, ciprofloxacin (500 mg 하루 2회 7일간 또는 서방형 ciprofloxacin 1000 mg 하루 1회 7-14일간), levofloxacin (500 mg 하루 1회 7일간 또는 750 mg 하루 1회 5일간), TMP-SMX (160/800 mg 하루 2회 14일간), 경구용  $\beta$ -lactam 항균제 (10-14일간)를 투여한다.

단순 급성신우신염의 경구용 항균제 치료 기간에 대한 좋은 근거는 많지 않다. 질환의 중증도와 치료 반응의 신속성에 따라서 치료 기간의 조절이 필요하다. 최근 ciprofloxacin 500 mg의 하루 2회 7일 투여군과 14일 투여군을 비교한 무작위 대조연구에서 단기간 임상 치료율은 각각 97%와 96%로 7일 투여군은 14일 투여군에 열등하지 않았다[105]. Ciprofloxacin은 배양 검사 결과 감수성을 보이는 경우 7일 치료 요법이 효과적이다. 또 다른 연구에서 남자에서 발생한 급성신우신염의 치료에서 7일 요법은 14일 요법에 비해 단기간 임상 치료율이 낮았으나(86% versus 98%), 여자의 경우 7일 요법은 14일 요법과 차이가 없었다[106]. 서방형 ciprofloxacin 1000 mg 하루 1회 투여한

표 7. 단순 급성 신우신염 환자의 외래 치료에서 경구용 항생제와 치료 기간(adapted from [78])

| Antibiotics                    | Daily dose     | Duration of therapy | References |
|--------------------------------|----------------|---------------------|------------|
| Ciprofloxacin                  | 500 mg bid     | 7 days              | [99, 105]  |
| Ciprofloxacin                  | 1000 mg qd     | 7-14 days           | [102]      |
| Levofloxacin                   | 750 mg qd      | 5 days              | [101]      |
| Ceftibuten                     | 400 mg qd      | 10 days             | [103]      |
| Cefpodoxime proxetil           | 200 mg bid     | 10 days             | [104]      |
| Trimethoprim-sulphamethoxazole | 160/800 mg bid | 14 days             | [99]       |

경우와 ciprofloxacin 500 mg 하루 2회를 각각 7-14일 투여한 경우를 비교하였을 때 임상적 미생물학적 치료율에 차이가 없어서 서방형 ciprofloxacin 1000 mg 하루 1회 7-14일 투여도 효과적이다[102]. Levofloxacin 750 mg 하루 1회 5일간 투여법도 우수한 임상적 치료율을 보였다[101].

TMP-SMX는 배양검사 결과에서 감수성을 보이는 경우 신우신염에 아주 효과적이다. 현재 TMP-SMX의 신우신염 치료 효과에 대한 연구들은 14일간 요법을 바탕으로 한다[99]. 경구용 cephalosporin에 대한 최신 연구자료는 제한적이지만 치료효과는 fluoroquinolone에 열등한 것으로 추정된다. 경구용 cephalosporin으로 신우신염을 치료하는 경우 10-14일간 치료한다[94].

G. 입원이 필요한 단순 신우신염의 경우 초기 정주용 항균제로

fluoroquinolone, aminoglycoside ± ampicillin, 2세대 cephalosporin, 광범위 cephalosporin, β-lactam/β-lactamase inhibitor ± aminoglycoside, aminoglycoside ± β-lactam, carbapenem을 투여하며, 해열이 된 후에는 분리된 원인균에 감수성이 있는 경구용 항생제나 내성률을 토대로 결정된 경구용 항생제로 변경하여 투여한다.

단순 급성신우신염의 중증도에 대한 분류기준은 명확하지 않다. 그러나 실제로 경구용 항생제를 복용할 수 있는 환자와 정주용 항생제가 필요한 환자로 구분할 수 있고, 통원치료와 입원치료를 나눌 수 있다(표 8). 입원이 필요한 경우는 지속적인 구토, 탈수, 병의 진행 또는 패혈증이 의심되거나 초기 외래 치료 동안 회복이 없는 경우이다[64]. 요로감염균의 fluoroquinolone의 내성률이 10% 이상인 경우에서 입원환자를 대상으로 한 fluoroquinolone의 초기 경험적 치료요법에 대한 연구는 많지 않다. 통원 치료 환자를 대상으로 한 국내 연구를 고려하였을 때[98], 사용해 볼 수 있으나 감수성 결과에 따라서 적절한 항생제로 교체가 필요하다. 한편 국내의 한 후향적 연구에서 cefuroxime을 초기 경험적 투여하였을 때 cefuroxime 감수성균에서 내성

표 8. 단순 급성 신우신염 환자의 입원 치료에서 경험적 정주용 항생제 (adapted from [78])

| Antibiotics and dosing                                            |
|-------------------------------------------------------------------|
| Ciprofloxacin 400mg iv twice daily                                |
| Levofloxacin 500-750mg iv once daily                              |
| Cefuroxime 750mg iv every 8 hours                                 |
| Ceftriaxone 1-2g iv once daily                                    |
| Cefepime 1g iv twice daily                                        |
| Amikacin 15mg/kg iv once daily ± ampicillin 1-2g iv every 6 hours |
| Piperacillin-tazobactam 3.375g iv every 6 hours                   |
| Meropenem 500-1000mg iv every 8 hours                             |
| Imipnem-cilastatin 500mg iv every 6 to 8hours                     |
| Doripenem 500mg every 8 hours                                     |
| Ertapenem 1g iv once daily                                        |

균에 비해 초기 임상적 치료율은 의미 있게 높았으나(90.8% vs. 68.2%,  $P = 0.001$ ), 후기 추적 임상 치료율(97.8% vs. 88.2%,  $P = 0.078$ )과 미생물학적 치료율(93.4% vs. 90.8%)은 차이가 없었다[107]. 한편 cefuroxime과 cefotaxime을 비교한 후향적연구에서도 cefotaxime과 비교하여 임상적 효과가 떨어지지 않았다[108]. Amikacin은 항균제 내성 그람 음성균에 의한 신우신염과 복잡성 요로감염에 경험적으로 사용될 수 있다[109]. 후향적 연구에서 amikacin은 ESBL 생성 균주에 의한 요로감염에서 성공적인 치료효과를 보였다[110].

지역사회 요로감염 원인균의 항생제 내성이 점차 증가함에 따라서 항생제 감수성 결과를 얻을 때까지 3세대 cephalosporin, piperacillin-tazobactam, 또는 carbapenem계 항생제같은 광범위 항균제를 사용할 수 있다. 중환자실 입원 치료가 필요한 중증 패혈증이나 패혈 쇼크를 동반한 급성 신우신염 환자를 치료할 때, 요로감염의 원인균에서 ESBL 생성균주의 빈도가 높은 곳에서는 감수성결과를 확인할 때까지 carbapenem계 항생제를 초기 경험적 치료로 고려할 수 있다[111].

② ESBL 생성 균주에 의한 단순 급성신우신염의 non-carbapenem계 항균제 치료 요법은?

<권고 사항>  
 감수성을 보이는 ESBL 생성 균주에 대해 fosfomycin, TMP-SMX, cefepime, ceftazidime-avibactam, ceftolozane-tazobactam, amoxicillin-clavulanate, piperacillin-tazobactam, amikacin을 carbapenem 대체로 사용해 볼 수 있다(근거수준: 낮음, 권고수준: 약함).

<근거 요약>

ESBL 생성균주에 의한 단순 급성신우신염에서 non-carbapenem계 항생제의 치료 요법에 대한 근거는 많지 않다. 한 후향적 연구에 따르면 ESBL 생성균주에 의한 요로감염에서 경구용 fosfomycin(3 g 매 72시간마다 또는 48시간마다)은 ertapenem (1 g 하루 1회 정맥주사)에 비해 요로감염 치료에 열등하지 않은 것으로 보고하였다[112].

TMP-SMX는 ESBL 생성균주에 의한 요로감염의 경험적 치료요법으로 권고되고 있지 않지만, ESBL 생성균주가 감수성을 보인다면 선택적 치료요법으로 사용해 볼 수 있다[94, 109].

Cefepime은 AmpC β-lactamase 생성 대장균(*E. coli*)에 감수성을 보여서 감수성 균주에 의한 신우신염을 포함한 요로감염의 치료 선택의 하나가 될 수 있다[113]. 하지만 ESBL 생성 균주, 특히 중증환자에게는 사용하지 말아야 한다[109]. Ceftazidime-avibactam 병합요법은 미국 FDA에 신우신염을 포함한 복잡성 요로감염에서 다른 치료 선택이 없거나 제한적일 때 사용을 승인받았다[109]. ESBL 생성균주에 의한 단순 급성신우신염에서 경험적 및 선택적 치료요법으로 사용해 볼 수 있다[114]. Ceftolozane-tazobactam(1.5 g 매 8시간마다, 7일간)을 신우신염을 포함한 복잡성 요로감염에서 고용량 levofloxacin(750 mg 하루 1회, 7일간)과 비교한 무작위 이중맹검 연구에서 고용량 levofloxacin에 비해 효과가 더 좋았고, 사후 분석에서



ESBL 생성 균주에 대해 levofloxacin보다 높은 치료율(58.3% vs. 34.9%)을 보여[115], ESBL 생성균주에 의한 단순 급성신우신염에서 경험적 및 선택적 치료요법으로 사용해 볼 수 있다(권고수준: 낮음, 권장강도: 약함).

ESBL 생성균주에 의한 감염증의 치료에서 beta-lactam/beta-lactamase 억제제의 사용에 대해서는 논란이 있으나, 최근 한 사후분석 연구에서 ESBL 생성 대장균(*E. coli*) 균혈증에서 amoxicillin-clavulanate와 piperacillin-tazobactam이 carbapenem과 비교하여 열등하지 않아 특히 선택적 치료로 carbapenem 대체로 사용해 볼 수 있음을 제시하였다[116]. 국내 한 후향적 연구에서도 ESBL 생성 *E. coli* 와 *K. pneumoniae* 균혈증에서 piperacillin-tazobactam을 carbapenem 대체약제로 제안하였다[117]. 따라서 amoxicillin-clavulanate는 감수성을 보이는 ESBL 생성 균주의 하부요로감염에 선택적 치료요법으로 사용해 볼 수 있고, piperacillin-tazobactam은 감수성을 보이는 ESBL 생성균주에 의한 신우신염을 포함한 복잡성 요로감염에서 선택적 치료요법으로 사용해 볼 수 있다.

Amikacin은 ESBL 생성균주에 의한 신우신염을 포함한 복잡성 요로감염의 치료요법으로 사용할 수 있다. 한 후향적 연구에 따르면 ESBL 생성 균주, 특히 *E. coli*에 의한 하부요로감염에서 amikacin의 임상적, 미생물학적 성공률은 각각 97.2%와 94.1%였다[110]. 또한 국내 후향적 연구에서도 균혈증이 동반되지 않은 요로감염에서 성공적인 치료효과를 보였다[118]. ESBL 생성균주에 의한 단순 신우신염에서 carbapenem의 대체 항생제에 대한 제한적인 근거로 위에 언급된 각각의 항생제에 감수성을 보이는 경우 제한적으로 사용해 볼 수 있고 추후 연구가 더 필요하겠다.

#### 4. 요로 폐쇄 관련 복잡성 신우신염

##### 1) 배경 및 국내 역할

요로 폐쇄는 감염성 신우신염의 병태 생리에 중요하다. 정상적인 요 배출에 장애가 발생하면 세균이 요로 내로 유입되고 결석 등의 이물질이 있으면 표면에 생물막(biofilm)이 형성되어 세균노가 지속된다. 또한 신장의 손상 정도는 요로 폐쇄의 기간에 비례하며 신장 기능의 회복력은 점진적으로 소실된다. 요 농축력은 요로 폐쇄가 1주일 정도면 완전 회복이 가능하지만 4주간 지속되면 요 농축력이 영구적으로 소실될 수 있다[119]. 요로 폐쇄에 의한 요로감염은 세균감염에 대한 항생제 치료 외에 요로 폐쇄의 감압이 신속히 이루어져야 하고 원인 질환에 따라서 개별화된 접근이 필요하다[120].

요로 폐쇄를 유발하는 주요한 질환은 연령에 따라 다양하다. 가장 흔한 원인 질환으로는 전립선 비대증과 신경인성 방광, 요로 결석 등이며 젊은 연령에서는 결석이, 고령에서는 전립선 비대증, 전립선암 및 골강 내 종양이 흔한 원인 질환이다[121]. 여성에서는 골반강 내 장기를 침범하는 질환(방광류, 직장류, 자궁탈출, 골반강 내 종양, 후궁자궁 등)이 요로 폐쇄를 일으킬 수 있다. 요로 폐쇄는 급성과 만성, 부분 폐쇄와 완전 폐쇄, 단측과 양측, 상부와 하부 요로 폐쇄로 분류할

수 있다.

요로 폐쇄 관련 요로감염의 원인 질환이 매우 다양하므로 해당 질환들을 통합하여 연구된 자료는 국내외에서 보고된 바 없으며 폐쇄를 일으킨 질환 별 원인균에 대한 접근 또한 거의 없다. 국내 수신증(hydronephrosis)에서 요로감염의 원인균으로서 *E. coli*, *Pseudomonas*, *Enterobacter*, *Proteus*, *Enterococcus*, *Citrobacter* spp. 등이 흔하였다[122]. 신경인성 방광의 요로 감염에서 가장 흔한 균은 *E. coli*였고 *E. faecalis*, *P. aeruginosa*, *P. mirabilis*, *K. pneumoniae*, *Streptococcus agalactiae* 등이 원인균이었다[123]. 신경인성 방광 또는 신경학적 이상을 동반한 환자에서 *Enterococcus*와 *Pseudomonas* spp.가 다른 요로감염에 비해 중요한 원인균이다. 감염성 요로 결석(infectious urinary stone, struvite stone)이나 사슴뿔 결석(staghorn calculi)이 생기려면 요소분해효소-양성균 요로감염이 선행되어야 한다[124, 125]. *Proteus*, *Morganella*, *Providencia* spp.는 모두 요소분해효소를 생산하나 *Klebsiella*, *Pseudomonas*, *Serratia*, *Staphylococcus* spp.도 다양하게 요소분해 효소를 생산한다. 사슴뿔 결석(staghorn calculi) 환자의 82%가 요소분해효소를 생산하는 미생물에 감염되고 흔한 원인균은 *Proteus*, *Klebsiella*, *Pseudomonas*, *Staphylococcus* spp.이다[125].

##### 2) 진단

요로 폐쇄는 감염의 치료 후 개별화된 특수한 진단 방법을 통해 원인 교정이 이루어져야 하며 이때는 비뇨기와 전문의, 영상의학과 전문의 등과 상의하는 것이 필요하다[121]. 상부 요로 폐쇄에서 초기 진단 방법으로 단순복부 촬영술(KUB±IVP), 초음파, CT 등을 시행할 수 있다. 기종성 신우신염(emphysematous pyelonephritis)의 진단과 병변의 범위를 확인하는 데에는 CT가 가장 유용하다[126]. 하부 요로 폐쇄는 방광의 요저류로 흔히 나타난다. 요저류가 의심되면 배뇨 후 잔뇨를 측정하여 100 mL를 초과하면 의미 있는 하부 요로 폐쇄를 시사한다. 폐쇄 발생 초기에는 배뇨일지, 소변세포검사(cytology), 초음파 검사, CT 및 남자 환자에서는 혈중 전립샘특이항원(PSA) 검사, 경직장 전립선 초음파 검사 등이 필요하다. 일류성 요실금(overflow incontinence), 파킨슨 병, 당뇨병성 신경병증, 뇌경색, 척추 손상, 신경학적 질환이 동반되거나 재발성 요로감염이 있으면 폐쇄성 요로감염이나 신경인성 방광을 원인 질환으로 고려해야 한다. 초기에 전반적인 신경학적 검사와 항문긴장반사(anal reflex tone), 항문 주위 감각(S2, S5)을 검진하고 이상이 발견되면 요역동학 검사(urodynamic study)를 하거나 필요하면 뇌나 척추의 자기공명영상 검사를 한다.

당뇨병이 있는 환자에서는 기종성 신우신염 같은 중증 요로감염이 더 흔하게 발생한다[127]. 기종성 방광염의 경우 육안적 혈뇨나 공기뇨(pneumaturia)가 있을 수 있고, 기종성 신우신염의 경우는 중증 패혈증의 양상을 띠며 옆구리에 종괴가 만져지거나 촉진 시 열발음(crepitus)이 있을 수도 있다. 기종성 방광염은 영상의학 검사에서 방광벽에 공기 음영이 보일 때 진단할 수 있고, 기종성 신우신염은 신우 또는 신장실질, 또는 신장 주위에 공기 음영이 보일 때 진단할 수 있다. 기종성 신우신염이 의심되는 환자는 질환의 진단과 침범 정도의

파악을 위해 CT 검사가 필요하다. 10개의 후향적 연구에 관한 체계적 문헌 고찰에서 기종성 신우신염을 진단하는데 단순 복부 X-선 촬영은 65-69%의 정확도를 보였으며, 초음파는 검사자에 의한 차이가 많고 기종을 결석이나 장관 내 가스와 구분하는 데 어려움이 많은 반면, CT 검사는 100%의 정확도를 보였다[128].

### 3) 핵심 질문별 권고안

① 요로 폐쇄 관련 신우신염이 발생한 성인 환자에서 초기에 투여할 적절한 경험적 항균제는 무엇인가?

#### <권고 사항>

- ① 요로 폐쇄 관련 신우신염 환자에서의 경험적 항생제 선택은 단순 신우신염 치료에 준해서 시행하면 되나, 임상 증상이 심한 경우에는 패혈증을 동반한 중증 요로감염의 경우에 준해서 시행한다(근거수준: 낮음, 권고수준: 강함).
- ② 초기 경험적 항생제로는 fluoroquinolone, beta-lactam/beta-lactamase inhibitor, 광범위 cephalosporin, aminoglycoside, carbapenem 등을 사용한다(근거수준: 낮음, 권고수준: 강함).
- ③ 패혈증을 동반한 경우와 잦은 재발성 감염인 경우에는 piperacillin/tazobactam, 광범위3세대 cephalosporin 또는 4세대 cephalosporin, carbapenem 등을 사용할 수 있다. 항생제 내성균 감염의 위험성이 높은 경우에는 광범위 beta-lactam 계열 항생제와 amikacin 병합을 고려할 수 있다(근거수준: 낮음, 권고수준: 약함).

#### <근거 요약>

요로 폐쇄 관련 신우신염 환자는 항생제 치료 중 요로 폐쇄의 제거 여부, 동반 질환의 중증도 및 기저 요로계 손상 정도에 따라 예후가 달라진다. 그러나 요로 폐쇄 관련 요로감염에 대한 최근까지의 연구들은 환자군의 특성이 너무나 다양하고 임상적 기준이 불명확하며 또한 비뇨기과적 예후가 고려되지 않아서 치료 지침을 제시하기에 제한점이 많다. 요로 폐쇄 관련 신우신염 환자를 대상으로 어떤 경험적 항균제를 사용할 것인가에 대한 비교 임상연구는 없다. 하지만 단순 신우신염 환자에서와 다른 종류의 항생제 사용을 권장할 만한 근거는 부족하다. 원인 미생물과 항균제 감수성은 질병의 중증도, 지역, 요로 폐쇄의 원인 질환, 의료관련 감염 혹은 지역사회 감염 여부에 따라 다양하다. 따라서 항생제 치료는 감염의 중증도, 요로 폐쇄 원인 질환, 잦은 재발, 의료관련 감염 여부 및 항생제 내성 유형에 따라 결정해야 한다. 일본에서 최근 시행된 다기관 연구에 따르면 요석과 관련된 폐쇄성 신우신염의 흔한 원인균은 *E. coli*, *Proteus mirabilis*, *K. pneumoniae* 순이었으며 비폐쇄성 요로감염의 원인과 크게 다르지 않았다[129]. 사망률은 2.3%였으며 사망의 위험인자로서 80세 이상 고령, 중증 패혈증, 의식 저하, 단측 신장 등이 확인되었다[129]. 요로 폐쇄 관련 신우신염 환자에서의 경험적 항생제 선택은 일반적인 신우신염 치료에 준해서 시행하면 되나 패혈증을 동반한 중증 요로감염에 준해서 시행할 필요

가 있다[125, 130]. 중증 신우신염에 준해서 항생제를 사용하며 신독성이 있는 항생제를 피하는 것이 바람직하다. 초기 경험적 항생제로는 fluoroquinolone, beta-lactam/beta-lactamase inhibitor, 3세대 cephalosporin, aminoglycoside 및 ertapenem 같은 carbapenem 등을 사용할 수 있다. 하지만, 국내에서 요로 감염을 유발한 *E. coli*의 ciprofloxacin, ampicillin/sulbactam, gentamicin 내성률이 높으므로 패혈증을 동반한 경우와 잦은 재발성 감염인 경우에는 piperacillin/tazobactam, 3세대 또는 4세대 cephalosporin, amikacin, carbapenem 등을 우선적으로 추천하고 있다. 일부 전문가들은 패혈증이 의심되는 중증 감염이나 의료관련 감염에서는 항녹농균 항균제를 초기에 사용할 것을 권한다. 광범위 항생제로 초기 경험적 치료를 시작한 후에는 배양 결과나 나오면 초기 경험적 치료를 배양 결과에 따라 재조정해야 한다. 치료 전에는 소변과 혈액 배양 검사를 반드시 시행한다. 항생제 사용 기간을 가능한 최소화해야 하지만 원인 질환이 다양하므로 각 질환 별로 개별화된 임상반응을 평가해야 한다. 요 폐쇄 유발 원인이 교정되고 추가적 감염의 요소가 없다면 7일에서 14일간 항생제를 사용한다. 원인 질환의 치료나 증상의 호전 및 요로 폐쇄의 교정이 불충분하면 21일 이상으로 항생제 치료 기간을 연장할 수 있다.

② 요로 폐쇄 관련 신우신염이 발생한 성인 환자에서 항생제 병합 요법은 단독 요법에 비해 우월한가?

#### <권고 사항>

- ① 요로 폐쇄 관련 신우신염 환자에서의 원인균과 항생제 감수성 결과를 아는 경우 신우신염의 치료 항생제로서 일반적으로 추천되는 감수성 있는 항생제를 단독 요법으로 사용한다(근거수준: 낮음, 권고수준: 강함).
- ② 패혈증이 의심되는 중증 감염, 재발이 많았던 경우나 의료관련 감염인 경우는 초기 경험적 치료를 강화하여 병합 요법을 고려할 수 있다(근거수준: 낮음, 권고수준: 약함).
- ③ 병합 요법을 고려하는 경우 광범위 beta-lactam 계 항생제와 aminoglycoside 또는 fluoroquinolone을 병합할 수 있다(근거수준: 낮음, 권고수준: 약함).

#### <근거 요약>

항균제 병합 요법이 감수성이 좋은 항균제로 단독 요법을 적절하게 시행한 것보다 우월하다는 근거는 부족하다. 원인균과 항균제 감수성 결과를 아는 경우 신우신염의 치료 항생제로서 일반적으로 추천하는 감수성 있는 항균제를 단독 요법으로 사용하면 충분하다[130]. 하지만, 패혈증이 의심되는 중증 감염, 재발이 많았던 경우나 의료관련 감염인 경우는 경험적 치료를 강화하여 병합 요법을 고려할 수 있다. 국내에서 수집된 ESBL 생성 *E. coli* 균주에서 piperacillin/tazobactam과 amikacin을 병합 투여할 경우 carbapenem과 거의 유사한 항균 범위를 보였다[131]. Fluoroquinolone을 병합해 볼 수도 있으나 fluoroquinolone 내성률이 amikacin 내성률보다 훨씬 높다[131].



③ 요로 폐쇄 관련 신우신염이 발생한 성인 환자에서 요로 폐쇄를 해소시켜야 하는가? 그렇다면 적정 시기는 언제인가?

**<권고 사항>**

- ① 요로 폐쇄 관련 신우신염은 항생제 치료와 함께 감압을 위한 시술이 필요하다(근거수준: 높음, 권고수준: 강함).
- ② 요로 폐쇄 관련 신우신염으로 진단되고 배액 또는 감압이 필요한 경우에는 가능한 빨리 시술을 시행해야 한다(근거수준: 낮음, 권고수준: 강함).
- ③ 요관 결석에 수반된 수신증과 요로감염이 있는 경우 경피적 신루 설치술 또는 요관 스텐트 삽입술을 가능한 빨리 시행한다(근거수준: 낮음, 권고수준: 강함).
- ④ 전립선 비대에 의한 급성 요로 폐쇄에 동반한 요로감염이 있는 경우 가능한 빨리 도뇨관을 삽입한다(근거수준: 낮음, 권고수준: 강함).

**<근거요약>**

요로 폐쇄 관련 신우신염은 항균제 치료와 함께 감압이 필요하다. 급성 요로 폐쇄는 즉시 감압이 필요한 응급 상황이며 수술이 필요할 수도 있다. 초기에는 최소한의 침습적 방법(도뇨관 삽입, 경피적 신루 설치술, 요관 스텐트 삽입 등)으로 감압하는 것이 좋으며 신장절제는 마지막 선택 방법이다[130]. 배액 또는 감압이 필요한 경우 가능한 빨리 시행하는 것이 필요하며, 배액을 위한 시술이 늦어지는 경우 재원 기간이 유의하게 증가되었다는 보고가 있다[129]. 감압 또는 배액을 위한 시술은 임상에서 흔히 시행되고 있으나 그 효과 및 합병증의 차이를 비교하고 분석한 연구는 매우 드물다. 요관 결석에 수반된 수신증과 요로감염이 있는 경우 일반적으로 경피적 신루 설치술을 먼저 시행하지만, 경피적 신루 설치술과 요관 스텐트 삽입술을 비교한 연구에서 치료 결과와 합병증의 유의한 차이는 없었다[132].

전립선 비대에 의한 급성 요로 폐쇄 환자에서 도뇨관의 적정한 유지 기간은 아직 결정되지 않았다. 도뇨관 삽입 초기나 자발 배뇨 시도 3일 전부터라도 알파차단제(alfuzocin, tamsulosin 등)를 사용하면 자발적 배뇨의 성공율이 높아진다. 14일 이상 도뇨관을 유지한 경우는 치골 상부 도뇨관(suprapubic catheterization)을 고려할 수 있다. 신경인성 방광의 기능 이상은 높은 방광 내 압력(일류성 요실금)이나 요 저류 증가 또는 두 가지 모두에 의해서 나타나는데, 감염의 치료와 함께 항콜린약을 단독 투여하거나 또는 알파차단제도 병합해서 사용할 수 있다.

④ 요로 폐쇄 관련 신우신염이 발생한 성인 환자에서 적절하게 요로 폐쇄를 해소시킨 이후 얼마나 항균제 치료를 시행해야 하는가?

**<권고 사항>**

- ① 요로 폐쇄 관련 신우신염 환자에서 요로 폐쇄 유발 요인이 교정되고 추가적 감염의 요소가 없다면 일반적으로 7일에서 14일간 항생제를 사용할 수 있다(근거수준: 낮음, 권고수준: 약함).

⑤ 원인 질환의 치료나 증상의 호전 및 요로 폐쇄의 교정이 불충분하면 신장 농양에 준해서 21일 이상 치료를 연장할 수 있다(근거수준: 낮음, 권고수준: 약함).

**<근거 요약>**

요로 폐쇄 관련 신우신염의 적절한 항생제 치료 기간에 대한 비교 임상연구는 없는 실정이다. 요로 폐쇄 유발 원인이 교정되고 추가적 감염의 요소가 없다면 일반적으로 7일에서 14일간 항균제를 사용한다[124, 130]. 원인 질환의 치료나 증상의 호전 및 요로 폐쇄의 교정이 불충분하면 신장 농양에 준해서 21일 이상 치료를 연장할 수 있다. 결석이 제거되지 않고 남아있으면 장기간 항균제 치료를 고려한다.

⑤ 기종성 신우신염(emphysematous pyelonephritis) 발생이 의심되는 성인 환자에서 어떤 경험적 항균제를 사용해야 하는가?

**<권고 사항>**

- ① 기종성 신우신염 발생이 의심되는 환자에서 경험적 항생제 선택은 단순 신우신염 치료에 준해서 시행하면 되나, 임상 증상이 심한 경우는 패혈증을 동반한 중증 요로감염의 경우에 준해서 시행한다(근거수준: 낮음, 권고수준: 강함).

**<근거요약>**

당뇨병이 있는 환자에서 발생한 신우신염 또는 기종성 신우신염 환자에서 원인균 분포는 단순 요로감염의 원인균과 크게 다르지 않아서 *E. coli*가 가장 흔한 원인균이다[127, 133]. 하지만 당뇨병이 없는 환자와 비교할 때 상대적으로 *K. pneumoniae*가 보다 흔한 원인균이다. 기종성 신우신염 환자를 대상으로 어떤 경험적 항균제를 사용할 것인가에 대한 비교 임상연구는 없다. 중증 신우신염에 준해서 항균제를 사용하며 신독성이 있는 항균제를 피하는 것이 바람직하다. 기종성 신우신염을 대상으로 한 연구에서 당뇨병이 없는 요로감염의 환자처럼 *E. coli*와 *K. pneumoniae*가 가장 흔한 원인균이었기 때문에 각 병원의 항균제 내성 정도를 고려하여 경험적 항균제를 선택해야 한다.

⑥ 기종성 신우신염(emphysematous pyelonephritis) 발생이 의심되는 성인 환자에서 경피적 배농술을 시행해야 하는가? 신장 절제술을 고려해야 하는 경우는 언제인가?

**<권고 사항>**

- ① 기종성 신우신염 발생이 의심되는 환자에서 가스 형성이 신우에 국한되고 신장 실질의 침범이 없는 경우는 항생제만 투여하며 신장 실질을 침범하는 경우는 항생제 투여와 함께 경피적 배농술이나 수술을 시행한다(근거수준: 낮음, 권고수준: 강함).
- ② 가스형성이 신장 주변부까지 광범위하게 침범한 경우와 경피적 배농술에도 호전이 없는 경우는 신장 절제술을 고려한다(근거수준: 낮음, 권고수준: 강함).

<근거 요약>

가스형성이 신우에 국한되고 신장 실질의 침범이 없는 경우는 항생제만 투여하며 신장 실질을 침범하는 경우는 항생제 투여와 함께 경피적 배농술이나 수술을 시행한다[133]. 가스 형성이 신장 주변부까지 광범위하게 침범한 경우와 경피적 배농술에도 호전이 없는 경우는 신장 절제술을 고려한다. 48명의 기종성 신우신염 환자를 대상으로 한 연구에서 CT 촬영 결과에 따라 환자를 4가지 그룹으로 분류하여 관찰하였는데, 가스가 신우에 국한되거나 신장 실질에 국한된 경우 항생제만을 사용한 환자들의 6%만이 사망한 반면, 가스 형성이 신장 주변부까지 광범위하게 침범한 경우나 양측 기종성 신우신염에서는 각각 21%, 50%가 사망하였다. 특히, 경피적 배농술을 시행한 환자 중 임상적으로 악화되어 수술한 환자의 88%가 생존하였으나, 수술을 시행하지 않은 환자는 모두 사망하였다[134]. 한편, 가스형성이 신우에만 국한된 5명의 기종성 신우신염 환자가 항생제 사용만으로 호전되었다는 보고가 있다[126]. 수술 없이 항생제 등 보존적 요법으로 치료받은 기종성 신우신염 환자 8명이 보고되었는데, 모두 당뇨병 환자였고 *E. coli* 가 원인균이었으며, 항생제, 수액요법 및 요관 스텐트 삽입 등으로 치료하여 8명 모두 호전되었다[135]. 기종성 신우신염 또는 기종성 방광염으로 진단받고 수술적 치료를 시행하지 않고 항생제와 경피적 배농술로 치료받은 28명을 분석한 한 연구에서 1명만이 사망하였고, 다른 환자는 모두 합병증 없이 완치되었다[136]. 이들 28명 중에서 60% 가량의 환자가 당뇨병을 가지고 있었고 가장 흔한 원인균은 *E. coli* 였다[136].

5. 급성 세균성 전립선염

1) 배경 및 국내 역학

전립선염은 감염성 또는 비감염성 염증에서부터 전립선의 만성 통증 증후군에 이르는 다양한 질병군을 말한다. 전립선염의 유병률은 높아서 약 10%의 남성이 전립선염 증상을 호소 하며, 약 50%의 남성이 일생 동안 한 번은 이 증상을 경험한다[137]. 하지만 이 중 약 7%만이 세균감염이 증명되는 세균성 전립선염이며, 나머지 대부분은 요로감염이 확인되지 않은 비세균성 만성전립선염/만성 골반통증후군이다[138]. 무증상전립선염은 전립선 비대증 환자 또는 전립선암 환자에서 조직검사나 수술을 시행한 후 우연히 진단되는 경우가 대부분이다[139, 140].

전립선염 증후군은 미국 National Institutes of Health (NIH)의 분류에 따라 4가지 범주로 나눌 수 있다(표 9)[141].

본 진료지침에서는 세균에 의한 원인이 확실하고 항생제 사용이 필요한 급성 세균성 전립선염만을 다루기로 한다.

급성 세균성 전립선염의 대부분의 경우는 요로병인성 세균, 가장 일반적으로 *E. coli* 로 인한다. 의료관련 감염에서는 *Pseudomonas aeruginosa* 및 *Enterococci*와 같은 세균도 흔하다. 위험 인자는 카테터 삽입과 같은 요로 조작이나 양성 전립선 비대증과 같은 해부학적 이상을 포함한다.

표 9. 전립선염 범주

- 1 급성세균성전립선염(Acute bacterial prostatitis, Category I)
- 2 만성세균성전립선염(Chronic bacterial prostatitis, Category II)
- 3 만성전립선염/만성골반통증후군(Chronic prostatitis/chronic pelvic pain syndrome, Category III)
  - a. 염증성(Inflammatory)
  - b. 비염증성(Non-inflammatory)
- 4 무증상전립선염(Asymptomatic prostatitis, Category IV)

2) 진단

급성세균성전립선염은 중증 급성 전신질환이다. 배뇨통, 빈뇨, 절박뇨 등 요로감염에 의한 증상, 회음부 통증, 성기 통증, 요통, 직장 통증 등 전립선염에 의한 증상, 그리고 발열, 오한, 관절통, 근육통 등 세균혈증에 의한 증상이 나타날 수 있다[14-16].

직장 수지검사 시 전립선 부위의 열감이 느껴지며, 부드럽지만 붓고 긴장된 전립선이 촉지되면서 극심한 압통이 특징이다[141, 142]. 합병증으로는 급성 요폐, 부고환염, 전립선 농양, 패혈증, 만성 세균성 전립선염 등이 있다[143]. 패혈증으로 또는 만성 세균성 전립선염으로의 진행은 적절한 치료로 예방될 수 있다. 전립선 농양은 2-18%에서 발생하며 특히 요로생식기의 조작 후에 발생한 전립선염의 경우에서 흔히 발생한다[144, 145].

급성세균성전립선염의 진단은 미생물학적으로 중간도에서 병원균을 발견하는 것이다. 세균혈증의 진단을 위해 혈액배양검사를 실시한다. 하지만 전립선 마사지는 심한 통증을 유발하고, 세균혈증을 조장할 수 있어서 급성 세균성 전립선염에서는 금기이다. 혈청에서 전립선특이항원(prostate specific antigen, PSA)의 증가 소견이 보이며, 이는 항생제 치료로 감소된다. 경직장 전립선 초음파검사(transrectal ultrasonography) 또는 전산화단층촬영은 전립선농양 여부를 확인하기 위해서 사용될 수 있다.

3) 핵심 질문별 권고안

- ① 급성 세균성 전립선염 환자의 경우 입원 및 정주용 항생제 치료가 경구 항균제 치료에 비해 효과적인가?

<권고 사항>

- ㉔ 급성 세균성 전립선염은 급성 중증질환이므로 입원치료와 즉각적인 경험적 항생제 투여가 필요하다(근거수준: 낮음, 권고수준: 강함).
- ㉕ 소변 및 혈액배양 검사를 위한 검체를 수집한 후 즉시 비경구적 항생제를 투여한다. 적절한 수분 공급 및 안정을 취하고 필요시에는 비스테로이드성 항염제와 같은 진통제를 투여한다(근거수준: 낮음, 권고수준: 강함).

<근거 요약>

급성 세균성 전립선염에 대한 메타분석 또는 무작위 대조군 연구

는 아직 없다. 항생제는 급성 세균성 전립선염 치료의 일차 선택이다 [146-149]. 국내의 후향적 증례조사 문헌들과 전문가 의견에 따른 지침들은 급성 전립선염에서 입원치료 및 초기 경험적 항생제 치료를 권장한다[145, 150].

- ② 급성 세균성 전립선염의 치료를 위한 경험적 항생제 선택은 3세대 cephalosporin을 fluoroquinolone제제보다 우선적으로 고려할 수 있는가?

#### <권고 사항>

- ③ 입원이 필요한 급성 세균성 전립선염 환자에 대한 항생제는 3세대 cephalosporin 제제, 광범위 beta-lactam/beta-lactamase inhibitor 또는 carbapenem 등을 권장한다(근거수준: 낮음, 권고수준: 강함).  
④ 항생제 감수성 결과가 나올 때까지 경험적 항생제 투여를 지속하며, 결과에 따라 항생제를 변경한다(근거수준: 낮음, 권고수준: 강함).

#### <근거 요약>

초기 경험적 항생제의 선택은 전립선에 침투하는 능력, 항생제 내성의 국내 패턴 및 의심되는 병원균에 근거하여 이루어진다[151]. 항생제의 선택과 사용 기간에 대한 무작위대조군연구는 아직 없다. 국내 fluoroquinolone의 요로감염 원인균에 대한 내성을 고려할 때, 입원이 필요한 환자에 대한 정주용 항생제로는 3세대 cephalosporin, 광범위  $\beta$ -lactam/ $\beta$ -lactamase inhibitor, carbapenem 등을 권장한다 [149]. 고농도의 정주용 항생제를 투여하고 증상이 호전되면 경구 항생제로 전환하여 2-4 주간 지속할 것을 권장한다.

- ③ 급성 세균성 전립선염 환자에서 cephalosporin과 aminoglycoside 의 병합 요법은 단독요법에 비해 치료 효과가 높은가?

#### <권고 사항>

- ③ 패혈증이 의심되는 중증 감염, 재발이 많았던 경우는 초기 경험적 항생제 치료를 강화하여 항생제 병합 요법을 고려할 수 있다(근거수준: 낮음, 권고수준: 약함).  
④ 항생제 병합 요법으로는 beta-lactam 계 항생제와 aminoglycoside 계 항생제의 병합 투여를 고려할 수 있다(근거수준: 낮음, 권고수준: 약함).

#### <근거 요약>

초기 경험적 항생제에 aminoglycoside를 추가하는 것에 대한 근거는 많지 않다. 국내외의 후향적 연구들에 따르면 특히 과거 하부요로의 조작이 있었던 환자에서는 병합 요법이 효과적이었다[145, 152]. 국내에서는 gentamicin과 tobramycin의 요로감염 원인 *E. coli*에 대한 내성이 amikacin에 비해 높기 때문에 병합 요법을 위한 aminoglycoside계 항생제로는 amikacin을 권장한다.

- ④ 급성 세균성 전립선염 환자에게 효율적 치료를 위하여 알파차단제와 같은 약물의 투여로 치료 효과를 높일 수 있는가?

#### <권고 사항>

- ③ 배뇨 후 잔뇨가 확인되거나 배뇨 증상을 호소하는 경우 알파차단제 사용을 권장한다(근거수준: 낮음, 권고수준: 강함).

#### <근거 요약>

급성 세균성 전립선염의 증상완화를 위해서는 보조 치료가 필요하다. 통증과 염증완화를 위해서는 비스테로이드항염증제 사용을 권장한다[146]. 하부요로증상에는 알파차단제를 권장하며, 국내에서 사용하는 tamsulosin, terazosin, alfuzosin, doxazosin, silodosin, naftopidil 등이 사용되고 있다[153].

- ⑤ 급성 세균성 전립선염 환자에서 요폐색이나 잔뇨가 증가할 경우 치골상부도뇨관 유지가 필요한가?

#### <권고 사항>

- ③ 급성 요폐가 있을 때에는 치골상부 도뇨관을 유지해야 한다(근거수준: 낮음, 권고수준: 강함).  
④ 요폐색의 증거가 없는 환자에서의 요도 도뇨관 유치는 만성 전립선염으로의 진행 가능성을 높일 수 있다(근거수준: 낮음, 권고수준: 약함).

#### <근거 요약>

급성 세균성 전립선염 환자에서 요폐색은 흔하게 발생할 수 있으며, 잔뇨가 증가하거나 급성 요폐가 의심되는 경우에는 즉시 도뇨관 유치를 고려해야 한다. 이 때는 전립선을 거치지 않는 치골상부도뇨관이 권장된다[154]. 간헐적 요도 도뇨 및 요도 도뇨관 유지도 비뇨기과 전문의 등의 판단 하에 요폐색 완화에 사용될 수 있다. 하지만 요폐색의 증거가 없는 환자에서의 요도 도뇨관 유치는 만성 전립선염으로의 진행을 높일 수 있기 때문에 요도 도뇨관 유지에는 주의를 요한다[155].

- ⑥ 급성 세균성 전립선염 환자에서 전립선 농양이 발생할 경우 천자 및 배농이 치료 성적을 향상시킬 수 있는가?

#### <권고 사항>

- ③ 항생제 치료에 반응하지 않는 전립선 농양에 대해서는 경직장 초음파유도 바늘 흡인, 경직장 초음파유도 카테터 배농, 경회음부 초음파유도 배농 또는 경요도 전립선 농양 절제술 등을 시행한다(근거수준: 낮음, 권고수준: 강함).

#### <근거 요약>

적절한 항생제 요법에도 불구하고 임상적으로 완전히 호전되지 않을 경우에는 전립선 농양발생을 의심해야 하며, 경직장 전립선 초음파검사 또는 전산화단층촬영을 시행한다 [156]. 만약 전립선 농양

이 발견되면 회음부 또는 요도를 통한 천자 및 배농을 고려한다[157]. 흡인 또는 배농에 반응이 없는 경우 경요도 전립선농양 절제술을 시행할 수 있다.

## Acknowledgement

This research was supported by a fund (2017-E21002-00) by Research of Korea Centers for Disease Control and Prevention. This manuscript was translated from the original Korean version.

## Conflicts of interest

No conflict of interest.

## ORCID

Cheol-In Kang <https://orcid.org/0000-0002-1741-4459>  
 Dae Won Park <http://orcid.org/0000-0002-7653-686X>  
 Baek-Nam Kim <https://orcid.org/0000-0001-5551-2132>  
 Seong-Heon Wie <https://orcid.org/0000-0002-7603-5520>  
 Jieun Kim <https://orcid.org/0000-0002-6214-3889>

## References

1. Canadian Agency for Drugs and Technologies in Health (CADTH). CADTH databases search filters. Available at: <https://www.cadth.ca/resources/finding-evidence/strings-attached-cadths-database-search-filters#guide>. Accessed February 4, 2017.
2. Nicolle LE, Bradley S, Colgan R, Rice JC, Schaeffer A, Hooton TM; Infectious Diseases Society of America; American Society of Nephrology; American Geriatric Society. Infectious Diseases Society of America guidelines for the diagnosis and treatment of asymptomatic bacteriuria in adults. *Clin Infect Dis* 2005;40:643-54.
3. Grabe M, Bartoletti R, Bjerklund-Johansen TE, Cai T, Çek M, Köves B, Naber KG, Pickard RS, Tenke P, Wagenlehner F, Wullt B. Guidelines on urological infections. Available at: [https://uroweb.org/wp-content/uploads/19-Urological-infections\\_LR2.pdf](https://uroweb.org/wp-content/uploads/19-Urological-infections_LR2.pdf). Accessed 7 July 2017.
4. Dull RB, Friedman SK, Risoldi ZM, Rice EC, Starlin RC, Destache CJ. Antimicrobial treatment of asymptomatic bacteriuria in noncatheterized adults: a systematic review. *Pharmacotherapy* 2014;34:941-60.
5. Nicolle LE. Asymptomatic bacteriuria. *Curr Opin Infect*

- Dis 2014;27:90-6.
6. Nicolle LE. The paradigm shift to non-treatment of asymptomatic bacteriuria. *Pathogens* 2016;5:pii:E38.
7. Bengtsson C, Bengtsson U, Björkelund C, Lincoln K, Sigurdsson JA. Bacteriuria in a population sample of women: 24-year follow-up study. Results from the prospective population-based study of women in Gothenburg, Sweden. *Scand J Urol Nephrol* 1998;32:284-9.
8. Evans DA, Williams DN, Laughlin LW, Miao L, Warren JW, Hennekens CH, Shimada J, Chapman WG, Rosner B, Taylor JO. Bacteriuria in a population-based cohort of women. *J Infect Dis* 1978;138:768-73.
9. Jeon MH, Park WB, Kim SR, Chun HK, Han SH, Bang JH, Park ES, Jeong SY, Eom JS, Kim YK, Kim HB, Lee KY, Choi HJ, Kim HY, Kim KM, Sung JH, Uh Y, Chung HS, Kwon JW, Woo JH. Korean nosocomial infections surveillance system, intensive care unit module report: data summary from July 2010 through June 2011. *Korean J Nosocomial Infect Control* 2012;17:28-39.
10. Shin JC, Yoo JH, Park JW, Park S, Ahn SJ, Park CI. Difference of organism and their antibiotics sensitivity from urine culture in symptomatic urinary tract infection of spinal cord injury patients. *J Korean Acad Rehabil Med* 2008;32:38-44.
11. Small FM, Vazquez JC. Antibiotics for asymptomatic bacteriuria in pregnancy. *Cochrane Database Syst Rev* 2015;(8):CD000490.
12. Kazemier BM, Koningstein FN, Schneeberger C, Ott A, Bossuyt PM, de Miranda E, Vogelvang TE, Verhoeven CJ, Langenveld J, Woiski M, Oudijk MA, van der Ven JE, Vlegels MT, Kuiper PN, Feiertag N, Pajkrt E, de Groot CJ, Mol BW, Geerlings SE. Maternal and neonatal consequences of treated and untreated asymptomatic bacteriuria in pregnancy: a prospective cohort study with an embedded randomised controlled trial. *Lancet Infect Dis* 2015;15:1324-33.
13. Angelescu K, Nussbaumer-Streit B, Sieben W, Scheibler F, Gartlehner G. Benefits and harms of screening for and treatment of asymptomatic bacteriuria in pregnancy: a systematic review. *BMC Pregnancy Childbirth* 2016;16:336.
14. Cai T, Mazzoli S, Mondaini N, Meacci F, Nesi G, D'Elia C, Malossini G, Boddi V, Bartoletti R. The role of asymptomatic bacteriuria in young women with recurrent urinary tract infections: to treat or not to treat? *Clin Infect Dis* 2012;55:771-7.
15. Cai T, Nesi G, Mazzoli S, Meacci F, Lanzafame P, Caciagli P,



- Mereu L, Tateo S, Malossini G, Selli C, Bartoletti R. Asymptomatic bacteriuria treatment is associated with a higher prevalence of antibiotic resistant strains in women with urinary tract infections. *Clin Infect Dis* 2015;61:1655-61.
16. Boscia JA, Kobasa WD, Knight RA, Abrutyn E, Levison ME, Kaye D. Therapy vs no therapy for bacteriuria in elderly ambulatory nonhospitalized women. *JAMA* 1987;257:1067-71.
  17. Abrutyn E, Mossey J, Berlin JA, Boscia J, Levison M, Pitsakis P, Kaye D. Does asymptomatic bacteriuria predict mortality and does antimicrobial treatment reduce mortality in elderly ambulatory women? *Ann Intern Med* 1994;120:827-33.
  18. Nicolle LE, Mayhew WJ, Bryan L. Prospective randomized comparison of therapy and no therapy for asymptomatic bacteriuria in institutionalized elderly women. *Am J Med* 1987;83:27-33.
  19. Ouslander JG, Schapira M, Schnelle JF, Uman G, Fingold S, Tuico E, Nigam JG. Does eradicating bacteriuria affect the severity of chronic urinary incontinence in nursing home residents? *Ann Intern Med* 1995;122:749-54.
  20. Harding GK, Zhanel GG, Nicolle LE, Cheang M; Manitoba Diabetes Urinary Tract Infection Study Group. Antimicrobial treatment in diabetic women with asymptomatic bacteriuria. *N Engl J Med* 2002;347:1576-83.
  21. Dalal S, Nicolle L, Marrs CF, Zhang L, Harding G, Foxman B. Long-term *Escherichia coli* asymptomatic bacteriuria among women with diabetes mellitus. *Clin Infect Dis* 2009;49:491-7.
  22. Mohler JL, Cowen DL, Flanigan RC. Suppression and treatment of urinary tract infection in patients with an intermittently catheterized neurogenic bladder. *J Urol* 1987;138:336-40.
  23. Maynard FM, Diokno AC. Urinary infection and complications during clean intermittent catheterization following spinal cord injury. *J Urol* 1984;132:943-6.
  24. Harding GK, Nicolle LE, Ronald AR, Preiksaitis JK, Forward KR, Low DE, Cheang M. How long should catheter-acquired urinary tract infection in women be treated? A randomized controlled study. *Ann Intern Med* 1991;114:713-9.
  25. Warren JW, Anthony WC, Hoopes JM, Muncie HL Jr. Cephalexin for susceptible bacteriuria in afebrile, long-term catheterized patients. *JAMA* 1982;248:454-8.
  26. Leone M, Perrin AS, Granier I, Visintini P, Blasco V, Antonini F, Albanèse J, Martin C. A randomized trial of catheter change and short course of antibiotics for asymptomatic bacteriuria in catheterized ICU patients. *Intensive Care Med* 2007;33:726-9.
  27. Hooton TM, Bradley SF, Cardenas DD, Colgan R, Geerlings SE, Rice JC, Saint S, Schaeffer AJ, Tambayh PA, Tenke P, Nicolle LE; Infectious Diseases Society of America. Diagnosis, prevention, and treatment of catheter-associated urinary tract infection in adults: 2009 International Clinical Practice Guidelines from the Infectious Diseases Society of America. *Clin Infect Dis* 2010;50:625-63.
  28. Grabe M, Forsgren A, Björk T, Hellsten S. Controlled trial of a short and a prolonged course with ciprofloxacin in patients undergoing transurethral prostatic surgery. *Eur J Clin Microbiol* 1987;6:11-7.
  29. Olsen JH, Friis-Møller A, Jensen SK, Korner B, Hvidt V. Cefotaxime for prevention of infectious complications in bacteriuric men undergoing transurethral prostatic resection. A controlled comparison with methenamine. *Scand J Urol Nephrol* 1983;17:299-301.
  30. Grabe M, Forsgren A, Hellsten S. The effect of a short antibiotic course in transurethral prostatic resection. *Scand J Urol Nephrol* 1984;18:37-42.
  31. Allan WR, Kumar A. Prophylactic mezlocillin for transurethral prostatectomy. *Br J Urol* 1985;57:46-9.
  32. Rao PN, Dube DA, Weightman NC, Oppenheim BA, Morris J. Prediction of septicemia following endourological manipulation for stones in the upper urinary tract. *J Urol* 1991;146:955-60.
  33. Cafferkey MT, Falkiner FR, Gillespie WA, Murphy DM. Antibiotics for the prevention of septicaemia in urology. *J Antimicrob Chemother* 1982;9:471-7.
  34. Nicolle LE. Uncomplicated urinary tract infection in adults including uncomplicated pyelonephritis. *Urol Clin North Am* 2008;35:1-12, v.
  35. Health Insurance Review & Assessment service (HIRA). In-depth analysis of drug consumption. Wonju: HIRA: 2015.
  36. Mazzulli T. Resistance trends in urinary tract pathogens and impact on management. *J Urol* 2002;168:1720-2.
  37. Lee SJ, Lee DS, Choe HS, Shim BS, Kim CS, Kim ME, Cho YH. Antimicrobial resistance in community-acquired urinary tract infections: results from the Korean Antimicrobial Resistance Monitoring System. *J Infect Chemother* 2011;17:440-6.
  38. Kim B, Kim J, Wie SH, Park SH, Cho YK, Lim SK, Shin SY, Yum JS, Lee JS, Kweon KT, Lee H, Cheong HJ, Park DW, Ryu SY, Chung MH, Pai H. Is it acceptable to select antibi-



- otics for the treatment of community-acquired acute cystitis based on the antibiotics susceptibility results for uropathogens from community-acquired acute pyelonephritis in Korea? *Infect Chemother* 2012;44:269-74.
39. Lee SJ, Lee SD, Cho IR, Sim BS, Lee JG, Kim CS, Kim ME, Cho YH, Woo YN. Antimicrobial susceptibility of uropathogens causing acute uncomplicated cystitis in female outpatients in South Korea: a multicentre study in 2002. *Int J Antimicrob Agents* 2004;24 (Suppl 1):S61-4.
  40. Kim ME, Ha US, Cho YH. Prevalence of antimicrobial resistance among uropathogens causing acute uncomplicated cystitis in female outpatients in South Korea: a multicentre study in 2006. *Int J Antimicrob Agents* 2008;31 (Suppl 1):S15-8.
  41. Kim HY, Lee SJ, Lee DS, Yoo JM, Choe HS. Microbiological characteristics of unresolved acute uncomplicated cystitis. *Microb Drug Resist* 2016;22:387-91.
  42. Kim WB, Cho KH, Lee SW, Yang HJ, Yun JH, Lee KW, Kim JM, Kim YH, Jeon YS, Kim ME. Recent antimicrobial susceptibilities for uropathogenic *Escherichia coli* in patients with community acquired urinary tract infections: a multicenter study. *Urogenit Tract Infect* 2017;12:28-34.
  43. Kim KY, Kim CS, Lim DH. The ciprofloxacin resistance pattern of *Escherichia coli* isolated from female patients with community-acquired urinary tract infection in the Jeonnam and Gwangju region for the recent 2-years. *Korean J Urol* 2008;49:540-8.
  44. The Korean Society of Infectious Diseases, The Korean Society for Chemotherapy, Korean Association of Urogenital Tract Infection and Inflammation, The Korean Society of Clinical Microbiology. Clinical guideline for the diagnosis and treatment of urinary tract infections: asymptomatic bacteriuria, uncomplicated & complicated urinary tract infections, bacterial prostatitis. *Infect Chemother* 2011;43:1-25.
  45. Bent S, Nallamotheu BK, Simel DL, Fihn SD, Saint S. Does this woman have an acute uncomplicated urinary tract infection? *JAMA* 2002;287:2701-10.
  46. Rowe TA, Juthani-Mehta M. Diagnosis and management of urinary tract infection in older adults. *Infect Dis Clin North Am* 2014;28:75-89.
  47. Simerville JA, Maxted WC, Pahira JJ. Urinalysis: a comprehensive review. *Am Fam Physician* 2005;71:1153-62.
  48. Rubin RH, Shapiro ED, Andriole VT, Davis RJ, Stamm WE. Evaluation of new anti-infective drugs for the treatment of urinary tract infection. *Infectious Diseases Society of America and the Food and Drug Administration. Clin Infect Dis* 1992;15 (Suppl 1):S216-27.
  49. Zalmanovici Trestioreanu A, Green H, Paul M, Yaphe J, Leibovici L. Antimicrobial agents for treating uncomplicated urinary tract infection in women. *Cochrane Database Syst Rev* 2010;(10):CD007182.
  50. Rafalsky V, Andreeva I, Rjabkova E. Quinolones for uncomplicated acute cystitis in women. *Cochrane Database Syst Rev* 2006;(3):CD003597.
  51. U.S. Food & Drug. Fluoroquinolone antimicrobial drugs information. Available at: <https://www.fda.gov/Drugs/DrugSafety/InformationbyDrugClass/ucm346750.htm>. Accessed 20 March 2018.
  52. Falagas ME, Vouloumanou EK, Togiag AG, Karadima M, Kapaskelis AM, Rafailidis PI, Athanasiou S. Fosfomycin versus other antibiotics for the treatment of cystitis: a meta-analysis of randomized controlled trials. *J Antimicrob Chemother* 2010;65:1862-77.
  53. Schito GC, Naber KG, Botto H, Palou J, Mazzei T, Gualco L, Marchese A. The ARESC study: an international survey on the antimicrobial resistance of pathogens involved in uncomplicated urinary tract infections. *Int J Antimicrob Agents* 2009;34:407-13.
  54. Zhanel GG, Walkty AJ, Karlowsky JA. Fosfomycin: a first-line oral therapy for acute uncomplicated cystitis. *Can J Infect Dis Med Microbiol* 2016;2016:2082693.
  55. Seo MR, Kim SJ, Kim Y, Kim J, Choi TY, Kang JO, Wie SH, Ki M, Cho YK, Lim SK, Lee JS, Kwon KT, Lee H, Cheong HJ, Park DW, Ryu SY, Chung MH, Pai H. Susceptibility of *Escherichia coli* from community-acquired urinary tract infection to fosfomycin, nitrofurantoin, and temocillin in Korea. *J Korean Med Sci* 2014;29:1178-81.
  56. Hooton TM, Roberts PL, Stapleton AE. Cefpodoxime vs ciprofloxacin for short-course treatment of acute uncomplicated cystitis: a randomized trial. *JAMA* 2012;307:583-9.
  57. Kavatha D, Giamarellou H, Alexiou Z, Vlachogiannis N, Pentea S, Gozadinos T, Poulakou G, Hatzipapas A, Koratzanis G. Cefpodoxime-proxetil versus trimethoprim-sulfamethoxazole for short-term therapy of uncomplicated acute cystitis in women. *Antimicrob Agents and Chemother* 2003;47:897-900.
  58. Raz R, Rottensterich E, Leshem Y, Tabenkin H. Double-blind study comparing 3-day regimens of cefixime and ofloxacin in treatment of uncomplicated urinary tract infections in women. *Antimicrob Agents Chemother* 1994;38:1176-7.
  59. Galkin VV, Malev IV, Dovgan' EV, Kozlov SN, Rafal'skiĭ VV. Efficacy and safety of cefixim and ciprofloxacin in acute

- cystitis (a multicenter randomized trial). *Urologia* 2011;(1):13-6.
60. Lee SJ, Ha US, Kim HW, Cho YH. Efficacy of cefcapene pivoxil for empirical therapy of acute uncomplicated cystitis. *Infect Chemother* 2008;40:162-6.
  61. Sohn DW, Ha US, Seo HJ, Lee JY, Kim SW, Cho YH. In-vitro susceptibility study of oral antibiotics to *Escherichia coli*, isolated from acute uncomplicated cystitis in female outpatients. *Infect Chemother* 2006;38:140-5.
  62. Roh KH, Yum JH, Yong D, Choi SH, Rhee JK, Yoo M, Lee K, Chong Y. In vitro activities of cefatrizine-clavulanic acid against gram-negative bacilli isolated from community-acquired urinary tract infection. *Korean J Lab Med* 2005;25:411-5.
  63. Lee SY, Lee JH, Kim JH, Hur JK, Kim SM, Ma SH, Kang JH. Susceptibility tests of oral antibiotics including cefixime against *Escherichia coli*, isolated from pediatric patients with community-acquired urinary tract infections. *Korean J Pediatr* 2006;49:777-83.
  64. Warren JW, Abrutyn E, Hebel JR, Johnson JR, Schaeffer AJ, Stamm WE. Guidelines for antimicrobial treatment of uncomplicated acute bacterial cystitis and acute pyelonephritis in women. *Infectious Diseases Society of America (IDSA). Clin Infect Dis* 1999;29:745-58.
  65. Kim JH, Sun HY, Kim TH, Shim SR, Doo SW, Yang WJ, Lee EJ, Song YS. Prevalence of antibiotic susceptibility and resistance of *Escherichia coli* in acute uncomplicated cystitis in Korea: systematic review and meta-analysis. *Medicine (Baltimore)* 2016;95:e4663.
  66. Pinart M, Kranz J, Jensen K, Proctor T, Naber K, Kunath F, Wagenlehner F, Schmidt S. Optimal dosage and duration of pivmecillinam treatment for uncomplicated lower urinary tract infections: a systematic review and meta-analysis. *Int J Infect Dis* 2017;58:96-109.
  67. Milo G, Katchman EA, Paul M, Christiaens T, Baerheim A, Leibovici L. Duration of antibacterial treatment for uncomplicated urinary tract infection in women. *Cochrane Database Syst Rev* 2005;(2):CD004682.
  68. Lutters M, Vogt-Ferrier NB. Antibiotic duration for treating uncomplicated, symptomatic lower urinary tract infections in elderly women. *Cochrane Database Syst Rev* 2008;(3):CD001535.
  69. Sadahira T, Wada K, Araki M, Ishii A, Takamoto A, Kobayashi Y, Watanabe M, Watanabe T, Nasu Y, Kumon H; Okayama Urological Research Group (OURG). Efficacy and safety of 3 day versus 7 day cefditoren pivoxil regimens for acute uncomplicated cystitis: multicentre, randomized, open-label trial. *J Antimicrob Chemother* 2017;72:529-34.
  70. Grigoryan L, Zoorob R, Wang H, Horsfield M, Gupta K, Trautner BW. Less workup, longer treatment, but no clinical benefit observed in women with diabetes and acute cystitis. *Diabetes Res Clin Pract* 2017;129:197-202.
  71. Katchman EA, Milo G, Paul M, Christiaens T, Baerheim A, Leibovici L. Three-day vs longer duration of antibiotic treatment for cystitis in women: systematic review and meta-analysis. *Am J Med* 2005;118:1196-207.
  72. Lifshitz E, Kramer L. Outpatient urine culture: does collection technique matter? *Arch Intern Med* 2000;160:2537-40.
  73. Bradbury SM. Collection of urine specimens in general practice: to clean or not to clean? *J R Coll Gen Pract* 1988;38:363-5.
  74. Barry HC, Ebell MH, Hickner J. Evaluation of suspected urinary tract infection in ambulatory women: a cost-utility analysis of office-based strategies. *J Fam Pract* 1997;44:49-60.
  75. Carlson KJ, Mulley AG. Management of acute dysuria. A decision-analysis model of alternative strategies. *Ann Intern Med* 1985;102:244-9.
  76. Foxman B. Epidemiology of urinary tract infections: incidence, morbidity, and economic costs. *Dis Mon* 2003;49:53-70.
  77. Kunin CM. Urinary tract infections in females. *Clin Infect Dis* 1994;18:1-10; quiz 11-2.
  78. Hooton TM. Clinical practice. Uncomplicated urinary tract infection. *N Engl J Med* 2012;366:1028-37.
  79. Ki M, Park T, Choi B, Foxman B. The epidemiology of acute pyelonephritis in South Korea, 1997-1999. *Am J Epidemiol* 2004;160:985-93.
  80. Scholes D, Hooton TM, Roberts PL, Gupta K, Stapleton AE, Stamm WE. Risk factors associated with acute pyelonephritis in healthy women. *Ann Intern Med* 2005;142:20-7.
  81. Czaja CA, Hooton TM. Update on acute uncomplicated urinary tract infection in women. *Postgrad Med* 2006;119:39-45.
  82. Ramakrishnan K, Scheid DC. Diagnosis and management of acute pyelonephritis in adults. *Am Fam Physician* 2005;71:933-42.
  83. Efstathiou SP, Pefanis AV, Tsioulos DI, Zacharos ID, Tsiakou AG, Mitromaras AG, Mastorantonakis SE, Kanavaki SN, Mountokalakis TD. Acute pyelonephritis in adults: prediction of mortality and failure of treatment. *Arch In-*

- tern Med 2003;163:1206-12.
84. Farrell DJ, Morrissey I, De Rubeis D, Robbins M, Felmingham D. A UK multicentre study of the antimicrobial susceptibility of bacterial pathogens causing urinary tract infection. *J Infect* 2003;46:94-100.
  85. Wie SH, Chang UI, Kim HW, Kim YS, Kim SY, Hur J, Kim SI, Kim YR, Kang MW. Clinical features and antimicrobial resistance among clinical isolates of women with community-acquired acute pyelonephritis in 2001-2006. *Infect Chemother* 2007;39:9-16.
  86. Hwang BY, Lee JG, Park DW, Lee YJ, Kim SB, Eom JS, Sohn JW, Cheong HJ, Kim WJ, Kim MJ, Park SC. Antimicrobial susceptibility of causative microorganisms in adults with acute pyelonephritis at on Univeristy-affiliated hospital in southwestern Seoul. *Infect Chemother* 2003;35:277-82.
  87. Wie SH, Choi SM, Lee DG, Kim SY, Kim SI, Yoo JH, Shin WS, Kang MW. Antibiotic sensitivity of the causative organisms and use of antibiotics in women with community-acquired acute pyelonephritis. *Korean J Infect Dis* 2002;34:353-9.
  88. Lee HN, Yoon H. Management of antibiotic-resistant acute pyelonephritis. *Urogenit Tract Infect* 2017;12:95-102.
  89. Kim B, Kim J, Seo MR, Wie SH, Cho YK, Lim SK, Lee JS, Kwon KT, Lee H, Cheong HJ, Park DW, Ryu SY, Chung MH, Ki M, Pai H. Clinical characteristics of community-acquired acute pyelonephritis caused by ESBL-producing pathogens in South Korea. *Infection* 2013;41:603-12.
  90. Sanchez GV, Master RN, Karlowsky JA, Bordon JM. In vitro antimicrobial resistance of urinary *Escherichia coli* isolates among U.S. outpatients from 2000 to 2010. *Antimicrob Agents Chemother* 2012;56:2181-3.
  91. Wie SH, Ki M, Kim J, Cho YK, Lim SK, Lee JS, Kwon KT, Lee H, Cheong HJ, Park DW, Ryu SY, Chung MH, Pai H. Clinical characteristics predicting early clinical failure after 72 h of antibiotic treatment in women with community-onset acute pyelonephritis: a prospective multicentre study. *Clin Microbiol Infect* 2014;20:O721-9.
  92. Wie SH. Urinary tract infections. In: The Korean Society for Infectious Diseases, eds. *Infectious Diseases*. 2nd ed. Seoul: Koonja Publishing Inc.; 2014;225-37.
  93. American College of Radiology. ACR Appropriateness Criteria®. Available at: <https://acsearch.acr.org/docs/69489/Narrative/>. Accessed 20 March 2018.
  94. Gupta K, Hooton TM, Naber KG, Wullt B, Colgan R, Miller LG, Moran GJ, Nicolle LE, Raz R, Schaeffer AJ, Soper DE; Infectious Diseases Society of America; European Society for Microbiology and Infectious Diseases. International clinical practice guidelines for the treatment of acute uncomplicated cystitis and pyelonephritis in women: A 2010 update by the Infectious Diseases Society of America and the European Society for Microbiology and Infectious Diseases. *Clin Infect Dis* 2011;52:e103-20.
  95. Neumann I, Moore P. Pyelonephritis (acute) in non-pregnant women. *BMJ Clin Evid* 2014;2014:pii:0807.
  96. Czaja CA, Scholes D, Hooton TM, Stamm WE. Population-based epidemiologic analysis of acute pyelonephritis. *Clin Infect Dis* 2007;45:273-80.
  97. van der Starre WE, van Dissel JT, van Nieuwkoop C. Treatment duration of febrile urinary tract infections. *Curr Infect Dis Rep* 2011;13:571-8.
  98. Jeon JH, Kim K, Han WD, Song SH, Park KU, Rhee JE, Song KH, Park WB, Kim ES, Park SW, Kim NJ, Oh MD, Kim HB. Empirical use of ciprofloxacin for acute uncomplicated pyelonephritis caused by *Escherichia coli* in communities where the prevalence of fluoroquinolone resistance is high. *Antimicrob Agents Chemother* 2012;56:3043-6.
  99. Talan DA, Stamm WE, Hooton TM, Moran GJ, Burke T, Iravani A, Reuning-Scherer J, Church DA. Comparison of ciprofloxacin (7 days) and trimethoprim-sulfamethoxazole (14 days) for acute uncomplicated pyelonephritis pyelonephritis in women: a randomized trial. *JAMA* 2000;283:1583-90.
  100. Stamm WE, McKeivitt M, Counts GW. Acute renal infection in women: treatment with trimethoprim-sulfamethoxazole or ampicillin for two or six weeks. A randomized trial. *Ann Intern Med* 1987;106:341-5.
  101. Klausner HA, Brown P, Peterson J, Kaul S, Khashab M, Fisher AC, Kahn JB. A trial of levofloxacin 750 mg once daily for 5 days vs. ciprofloxacin 400 mg and/or 500 mg twice daily for 10 days in the treatment of acute pyelonephritis. *Curr Med Res Opin* 2007;23:2637-45.
  102. Talan DA, Klimberg IW, Nicolle LE, Song J, Kowalsky SF, Church DA. Once daily, extended release ciprofloxacin for complicated urinary tract infections and acute uncomplicated pyelonephritis. *J Urol* 2004;171:734-9.
  103. Cronberg S, Banke S, Bergman B, Boman H, Eilard T, Elbel E, Hugo-Persson M, Johansson E, Kuylenstierna N, Lanbeck P, Lindblom A, Paulsen O, Schönbeck C, Walder M, Wieslander P. Fewer bacterial relapses after oral treatment with norfloxacin than with cefitibuten in acute py-

- elonephritis initially treated with intravenous cefuroxime. *Scand J Infect Dis* 2001;33:339-43.
104. Wagenlehner FM, Weidner W, Naber KG. An update on uncomplicated urinary tract infections in women. *Curr Opin Urol* 2009;19:368-74.
105. Sandberg T, Skoog G, Hermansson AB, Kahlmeter G, Kuylenstierna N, Lannergård A, Otto G, Settergren B, Ekman GS. Ciprofloxacin for 7 days vs. 14 days in women with acute pyelonephritis: a randomised, open-label and double-blind, placebo-controlled, non-inferiority trial. *Lancet* 2012;380:484-90.
106. van Nieuwkoop C, van der Starre WE, Stalenhoef JE, van Aartrijk AM, van der Reijden TJ, Vollaard AM, Delfos NM, van 't Wout JW, Blom JW, Spelt IC, Leyten EM, Koster T, Ablj HC, van der Beek MT, Knol MJ, van Dissel JT. Treatment duration of febrile urinary tract infection: a pragmatic randomized, double-blind, placebo-controlled non-inferiority trial in men and women. *BMC Med* 2017;15:70.
107. Chang UI, Kim HW, Wie SH. Use of cefuroxime for women with community-onset acute pyelonephritis caused by cefuroxime-susceptible or -resistant *Escherichia coli*. *Korean J Intern Med* 2016;31:145-55.
108. Chang UI, Kim HW, Wie SH. Comparison of second- and third-generation cephalosporin as initial therapy for women with community-onset uncomplicated acute pyelonephritis. *Yonsei Med J* 2015;56:1266-73.
109. Bader MS, Loeb M, Brooks AA. An update on the management of urinary tract infections in the era of antimicrobial resistance. *Postgrad Med* 2017;129:242-58.
110. Ipekci T, Seyman D, Berk H, Celik O. Clinical and bacteriological efficacy of amikacin in the treatment of lower urinary tract infection caused by extended-spectrum beta-lactamase-producing *Escherichia coli* or *Klebsiella pneumoniae*. *J Infect Chemother* 2014;20:762-7.
111. Pietrucha-Dilanchian P, Hooton TM. Diagnosis, treatment, and prevention of urinary tract infection. *Microbiol Spectr* 2016;4:UTI-0021-2015.
112. Veve MP, Wagner JL, Kenney RM, Grunwald JL, Davis SL. Comparison of fosfomycin to ertapenem for outpatient or step-down therapy of extended-spectrum beta-lactamase urinary tract infections. *Int J Antimicrob Agents* 2016;48:56-60.
113. Tamma PD, Girdwood SC, Gopaul R, Tekle T, Roberts AA, Harris AD, Cosgrove SE, Carroll KC. The use of cefepime for treating AmpC  $\beta$ -lactamase-producing Enterobacteriaceae. *Clin Infect Dis* 2013;57:781-8.
114. Wagenlehner FM, Sobel JD, Newell P, Armstrong J, Huang X, Stone GG, Yates K, Gasink LB. Ceftazidime-avibactam versus doripenem for the treatment of complicated urinary tract infections, including acute pyelonephritis: RECAPTURE, a phase 3 randomized trial program. *Clin Infect Dis* 2016;63:754-62.
115. Wagenlehner FM, Umeh O, Steenbergen J, Yuan G, Darouiche RO. Ceftolozane-tazobactam compared with levofloxacin in the treatment of complicated urinary-tract infections, including pyelonephritis: a randomised, double-blind, phase 3 trial (ASPECT-cUTI). *Lancet* 2015;385:1949-56.
116. Rodríguez-Baño JI, Navarro MD, Retamar P, Picón E, Pascual Á; Extended-Spectrum Beta-Lactamases-Red Española de Investigación en Patología Infecciosa/Grupo de Estudio de Infección Hospitalaria Group.  $\beta$ -Lactam/  $\beta$ -lactam inhibitor combinations for the treatment of bacteremia due to extended-spectrum beta-lactamase-producing *Escherichia coli*: a post hoc analysis of prospective cohorts. *Clin Infect Dis* 2012;54:167-74.
117. Kang CI, Park SY, Chung DR, Peck KR, Song JH. Piperacillin-tazobactam as an initial empirical therapy of bacteremia caused by extended-spectrum  $\beta$ -lactamase-producing *Escherichia coli* and *Klebsiella pneumoniae*. *J Infect* 2012;64:533-4.
118. Cho SY, Choi SM, Park SH, Lee DG, Choi JH, Yoo JH. Amikacin therapy for urinary tract infections caused by extended-spectrum  $\beta$ -lactamase-producing *Escherichia coli*. *Korean J Intern Med* 2016;31:156-61.
119. Klahr S. Obstructive nephropathy. *Intern Med* 2000;39:355-61.
120. Reyner K, Heffner AC, Karvetski CH. Urinary obstruction is an important complicating factor in patients with septic shock due to urinary infection. *Am J of Emerg Med* 2016;34:694-6.
121. Heyns CF. Urinary tract infection associated with conditions causing urinary tract obstruction and stasis, excluding urolithiasis and neuropathic bladder. *World J Urol* 2012;30:77-83.
122. Kim SC, Wang CS. A clinical observation on 131 cases of hydronephrosis. *Korean J of Urology* 1978;19:89-97.
123. Romero Cullerés G, Sugrañes JC, Planells Romeo I, Giménez Pérez M. Characteristics of urinary tract infections in different patient subpopulations and depending on the bladder emptying system. *Actas Urol Esp* 2010;34:251-7.
124. Marien T, Miller NL. Treatment of the Infected Stone. *Urol Clin North Am* 2015;42:459-72.



125. Brown PD. Management of urinary tract infections associated with nephrolithiasis. *Curr Infect Dis Rep* 2010;12:450-4.
126. Roy C, Pflieger DD, Tuchmann CM, Lang HH, Saussine CC, Jacqmin D. Emphysematous pyelitis: findings in five patients. *Radiology* 2001;218:647-50.
127. Olvera-Posada D, Armengod-Fischer G, Vázquez-Lavista LG, Maldonado-Ávila M, Rosas-Nava E, Manzanilla-García H, Castillejos-Molina RA, Méndez-Probst CE, Sotomayor M, Feria-Bernal G, Rodríguez-Covarrubias F. Emphysematous pyelonephritis: multicenter clinical and therapeutic experience in Mexico. *Urology* 2014;83:1280-4.
128. Somani BK, Nabi G, Thorpe P, Hussey J, Cook J, N'Dow J; ABACUS Research Group. Is percutaneous drainage the new gold standard in the management of emphysematous pyelonephritis? Evidence from a systematic review. *J Urol* 2008;179:1844-9.
129. Hamasuna R, Takahashi S, Nagae H, Kubo T, Yamamoto S, Arakawa S, Matsumoto T. Obstructive pyelonephritis as a result of urolithiasis in Japan: diagnosis, treatment and prognosis. *Int J Urol* 2015;22:294-300.
130. Wagenlehner FM, Lichtenstern C, Rolfes C, Mayer K, Uhle F, Weidner W, Weigand MA. Diagnosis and management for urosepsis. *Int J Urol* 2013;20:963-70.
131. Cha MK, Kang CI, Kim SH, Cho SY, Ha YE, Wi YM, Chung DR3, Peck KR4, Song JH3; Korean Network for Study on Infectious Diseases (KONSID). *In vitro* activities of 21 antimicrobial agents alone and in combination with aminoglycosides or fluoroquinolones against extended-spectrum- $\beta$ -lactamase-producing *Escherichia coli* isolates causing bacteremia. *Antimicrob Agents Chemother* 2015;59:5834-7.
132. Ramsey S, Robertson A, Ablett MJ, Meddings RN, Hollins GW, Little B. Evidence-based drainage of infected hydro-nephrosis secondary to ureteric calculi. *J Endourol* 2010;24:185-9.
133. Aboumarzouk OM, Hughes O, Narahari K, Coulthard R, Kynaston H, Chlosta P, Somani B. Emphysematous pyelonephritis: Time for a management plan with an evidence-based approach. *Arab J Urol* 2014;12:106-15.
134. Huang JJ, Tseng CC. Emphysematous pyelonephritis: clinicoradiological classification, management, prognosis, and pathogenesis. *Arch Intern Med* 2000;160:797-805.
135. Kolla PK, Madhav D, Reddy S, Pentyala S, Kumar P, Pathapati RM. Clinical profile and outcome of conservatively managed emphysematous pyelonephritis. *ISRN Urol* 2012;2012:931982.
136. Bjurlin MA, Hurley SD, Kim DY, Cohn MR, Jordan MD, Kim R, Divakaruni N, Hollowell CM. Clinical outcomes of nonoperative management in emphysematous urinary tract infections. *Urology* 2012;79:1281-5.
137. Nickel JC, Alexander RB, Anderson R, Berger R, Comiter CV, Datta NS, Fowler JE, Krieger JN, Landis JR, Litwin MS, McNaughton-Collins M, O'Leary MP, Pontari MA, Schaeffer AJ, Shoskes DA, White P, Kusek J, Nyberg L; Chronic Prostatitis Collaborative Research Network Study Groups. Category III chronic prostatitis/chronic pelvic pain syndrome: insights from the National Institutes of Health Chronic Prostatitis Collaborative Research Network studies. *Curr Urol Rep* 2008;9:320-7.
138. Weidner W, Schiefer HG, Krauss H, Jantos C, Friedrich HJ, Altmannsberger M. Chronic prostatitis: a thorough search for etiologically involved microorganisms in 1,461 patients. *Infection* 1991;19 (Suppl 3):S119-25.
139. Nickel JC, Downey J, Young I, Boag S. Asymptomatic inflammation and/or infection in benign prostatic hyperplasia. *BJU Int* 1999;84:976-81.
140. Nelson WG, De Marzo AM, DeWeese TL, Isaacs WB. The role of inflammation in the pathogenesis of prostate cancer. *J Urol* 2004;172:S6-11; discussion S11-2.
141. Krieger JN, Nyberg L Jr, Nickel JC. NIH consensus definition and classification of prostatitis. *JAMA* 1999;282:236-7.
142. Leigh DA. Prostatitis--an increasing clinical problem for diagnosis and management. *J Antimicrob Chemother* 1993;32 (Suppl A):1-9.
143. Ludwig M. Diagnosis and therapy of acute prostatitis, epididymitis and orchitis. *Andrologia* 2008;40:76-80.
144. Kravchick S, Cytron S, Agulansky L, Ben-Dor D. Acute prostatitis in middle-aged men: a prospective study. *BJU Int* 2004;93:93-6.
145. Ha US, Kim ME, Kim CS, Shim BS, Han CH, Lee SD, Cho YH. Acute bacterial prostatitis in Korea: clinical outcome, including symptoms, management, microbiology and course of disease. *Int J Antimicrob Agents* 2008;31 (Suppl 1):S96-101.
146. Brede CM, Shoskes DA. The etiology and management of acute prostatitis. *Nat Rev Urol* 2011;8:207-12.
147. Sharp VJ, Takacs EB, Powell CR. Prostatitis: diagnosis and treatment. *Am Fam Physician* 2010;82:397-406.
148. Groen J, Pannek J, Castro Diaz D, Del Popolo G, Gross T, Hamid R, Karsenty G, Kessler TM, Schneider M, 't Hoen L, Blok B. Summary of European Association of Urology



- (EAU) guidelines on Neuro-Urology. *Eur Urol* 2016;69:324-33.
149. Lipsky BA, Byren I, Hoey CT. Treatment of bacterial prostatitis. *Clin Infect Dis* 2010;50:1641-52.
150. Etienne M, Chavanet P, Sibert L, Michel F, Levesque H, Lorcerie B, Doucet J, Pfitzenmeyer P, Caron F. Acute bacterial prostatitis: heterogeneity in diagnostic criteria and management. Retrospective multicentric analysis of 371 patients diagnosed with acute prostatitis. *BMC Infect Dis* 2008;8:12.
151. Charalabopoulos K, Karachalios G, Baltogiannis D, Charalabopoulos A, Giannakopoulos X, Sofikitis N. Penetration of antimicrobial agents into the prostate. *Chemotherapy* 2003;49:269-79.
152. Millán-Rodríguez F, Palou J, Bujons-Tur A, Musquera-Felip M, Sevilla-Cecilia C, Serrallach-Orejas M, Baez-Angles C, Villavicencio-Mavrich H. Acute bacterial prostatitis: two different sub-categories according to a previous manipulation of the lower urinary tract. *World J Urol* 2006;24:45-50.
153. Nickel JC. The use of alpha1-adrenoceptor antagonists in lower urinary tract symptoms: beyond benign prostatic hyperplasia. *Urology* 2003;62 (3 Suppl 1):34-41.
154. Wagenlehner FM, Pilatz A, Bschiepfer T, Diemer T, Linn T, Meinhardt A, Schagdarsurengin U, Dansranjav T, Schuppe HC, Weidner W. Bacterial prostatitis. *World J Urol* 2013;31:711-6.
155. Yoon BI, Kim S, Han DS, Ha US, Lee SJ, Kim HW, Han CH, Cho YH. Acute bacterial prostatitis: how to prevent and manage chronic infection? *J Infect Chemother* 2012;18:444-50.
156. Meares EM Jr. Prostatic abscess. *J Urol* 1986;136:1281-2.
157. Meares EM Jr. Acute and chronic prostatitis: diagnosis and treatment. *Infect Dis Clin North Am* 1987;1:855-73.
